# Supplementary material for: Validation of a 3D Camera System for Cycling Analysis
Source: MDPI journal article supplement (doi:10.3390/s21134473), 2021-06-30

**Bland-Altman Plot 01: A.Min Variable**

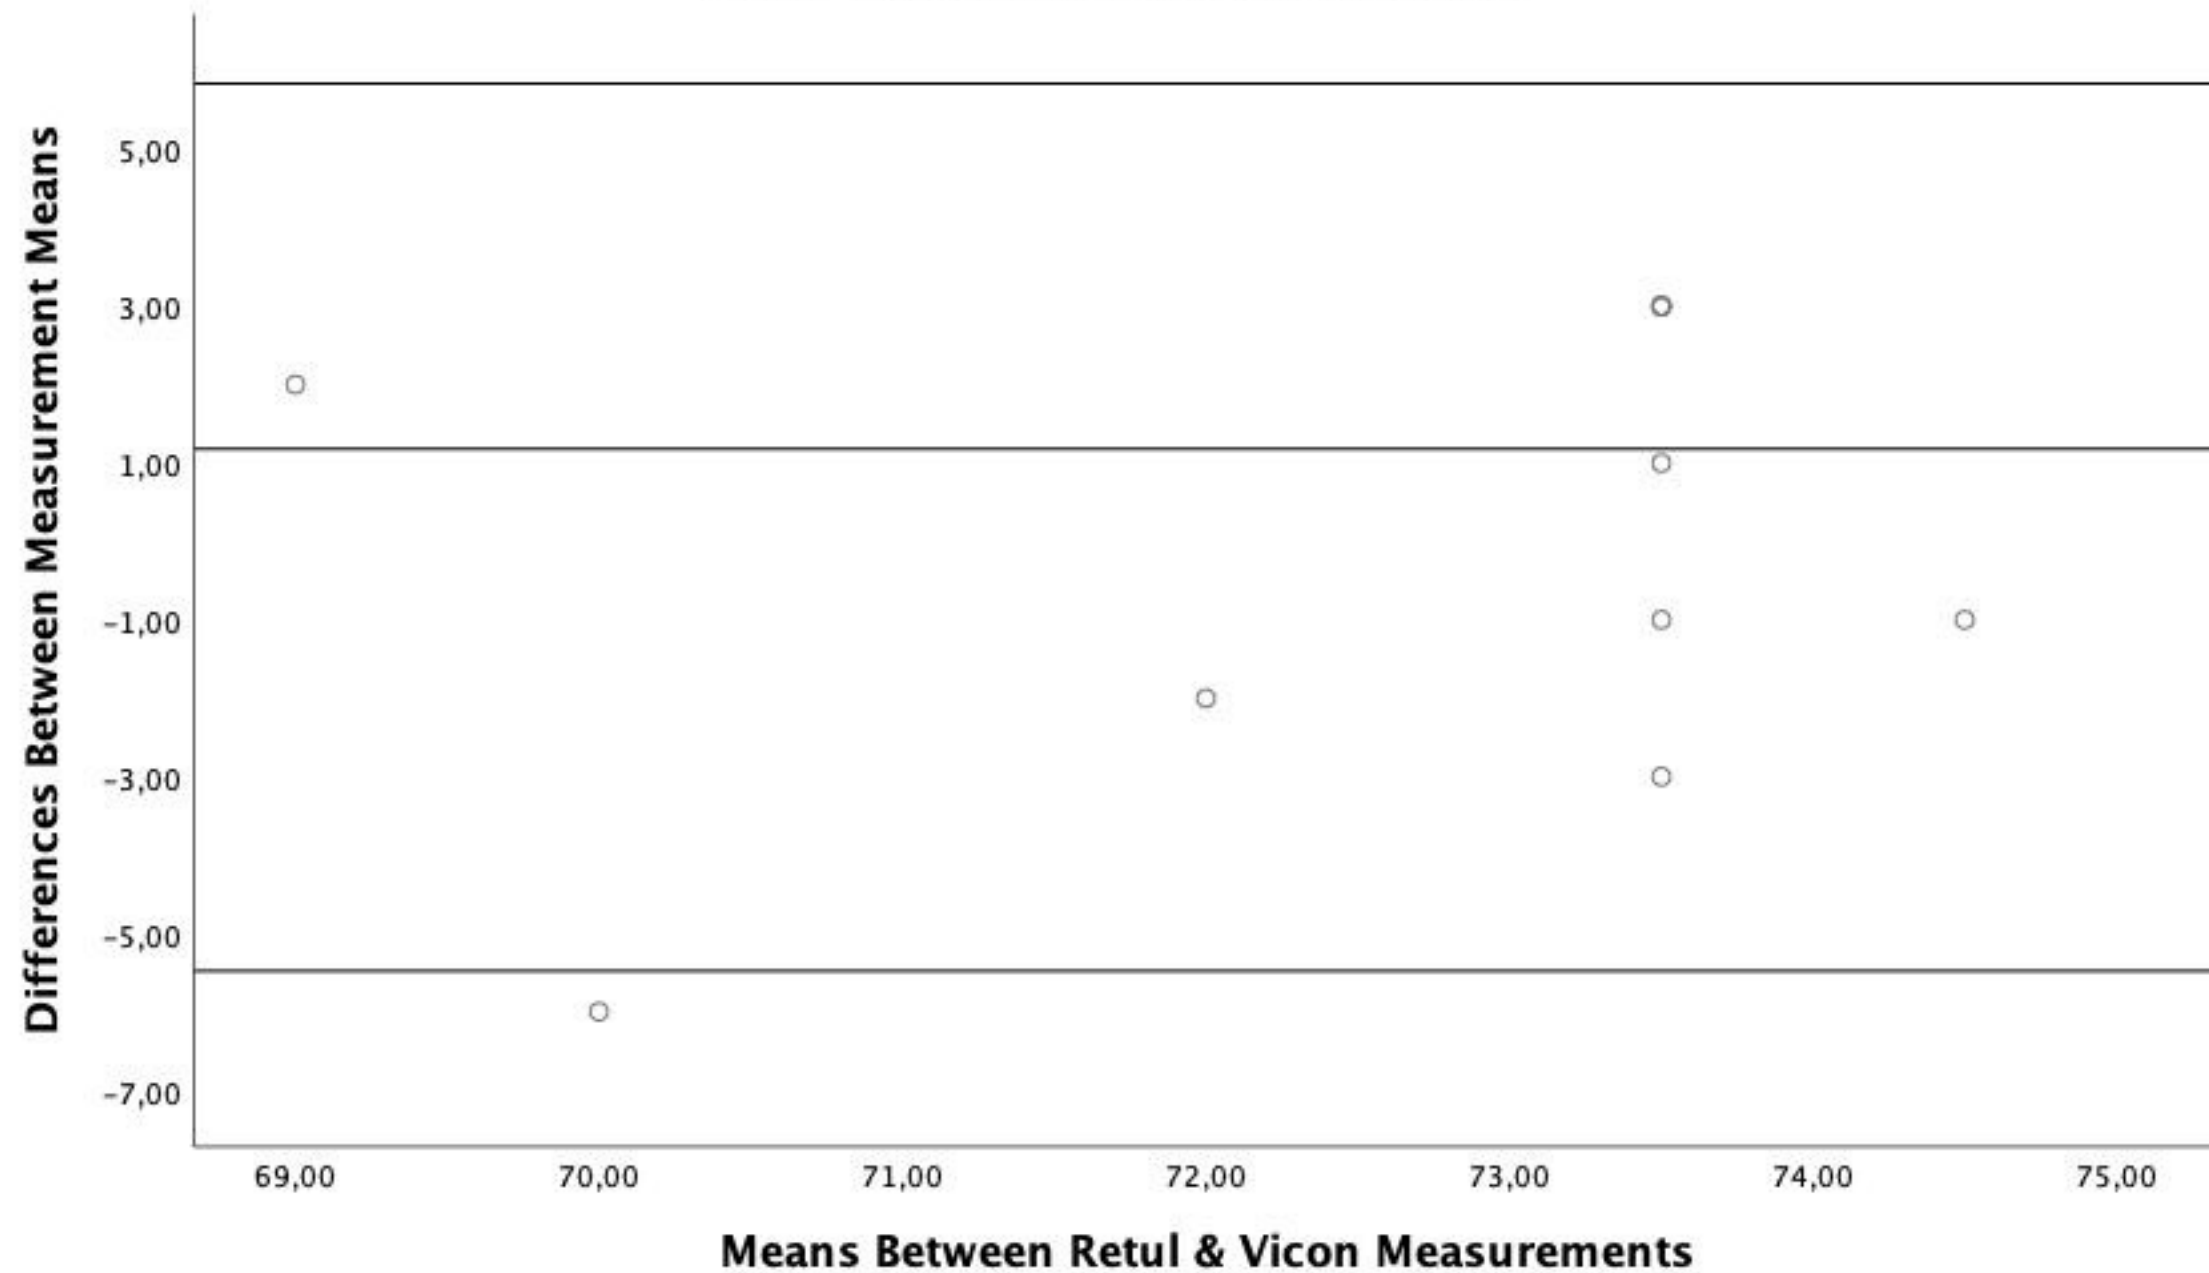

**Bland-Altman Plot 02: A.Max Variable**

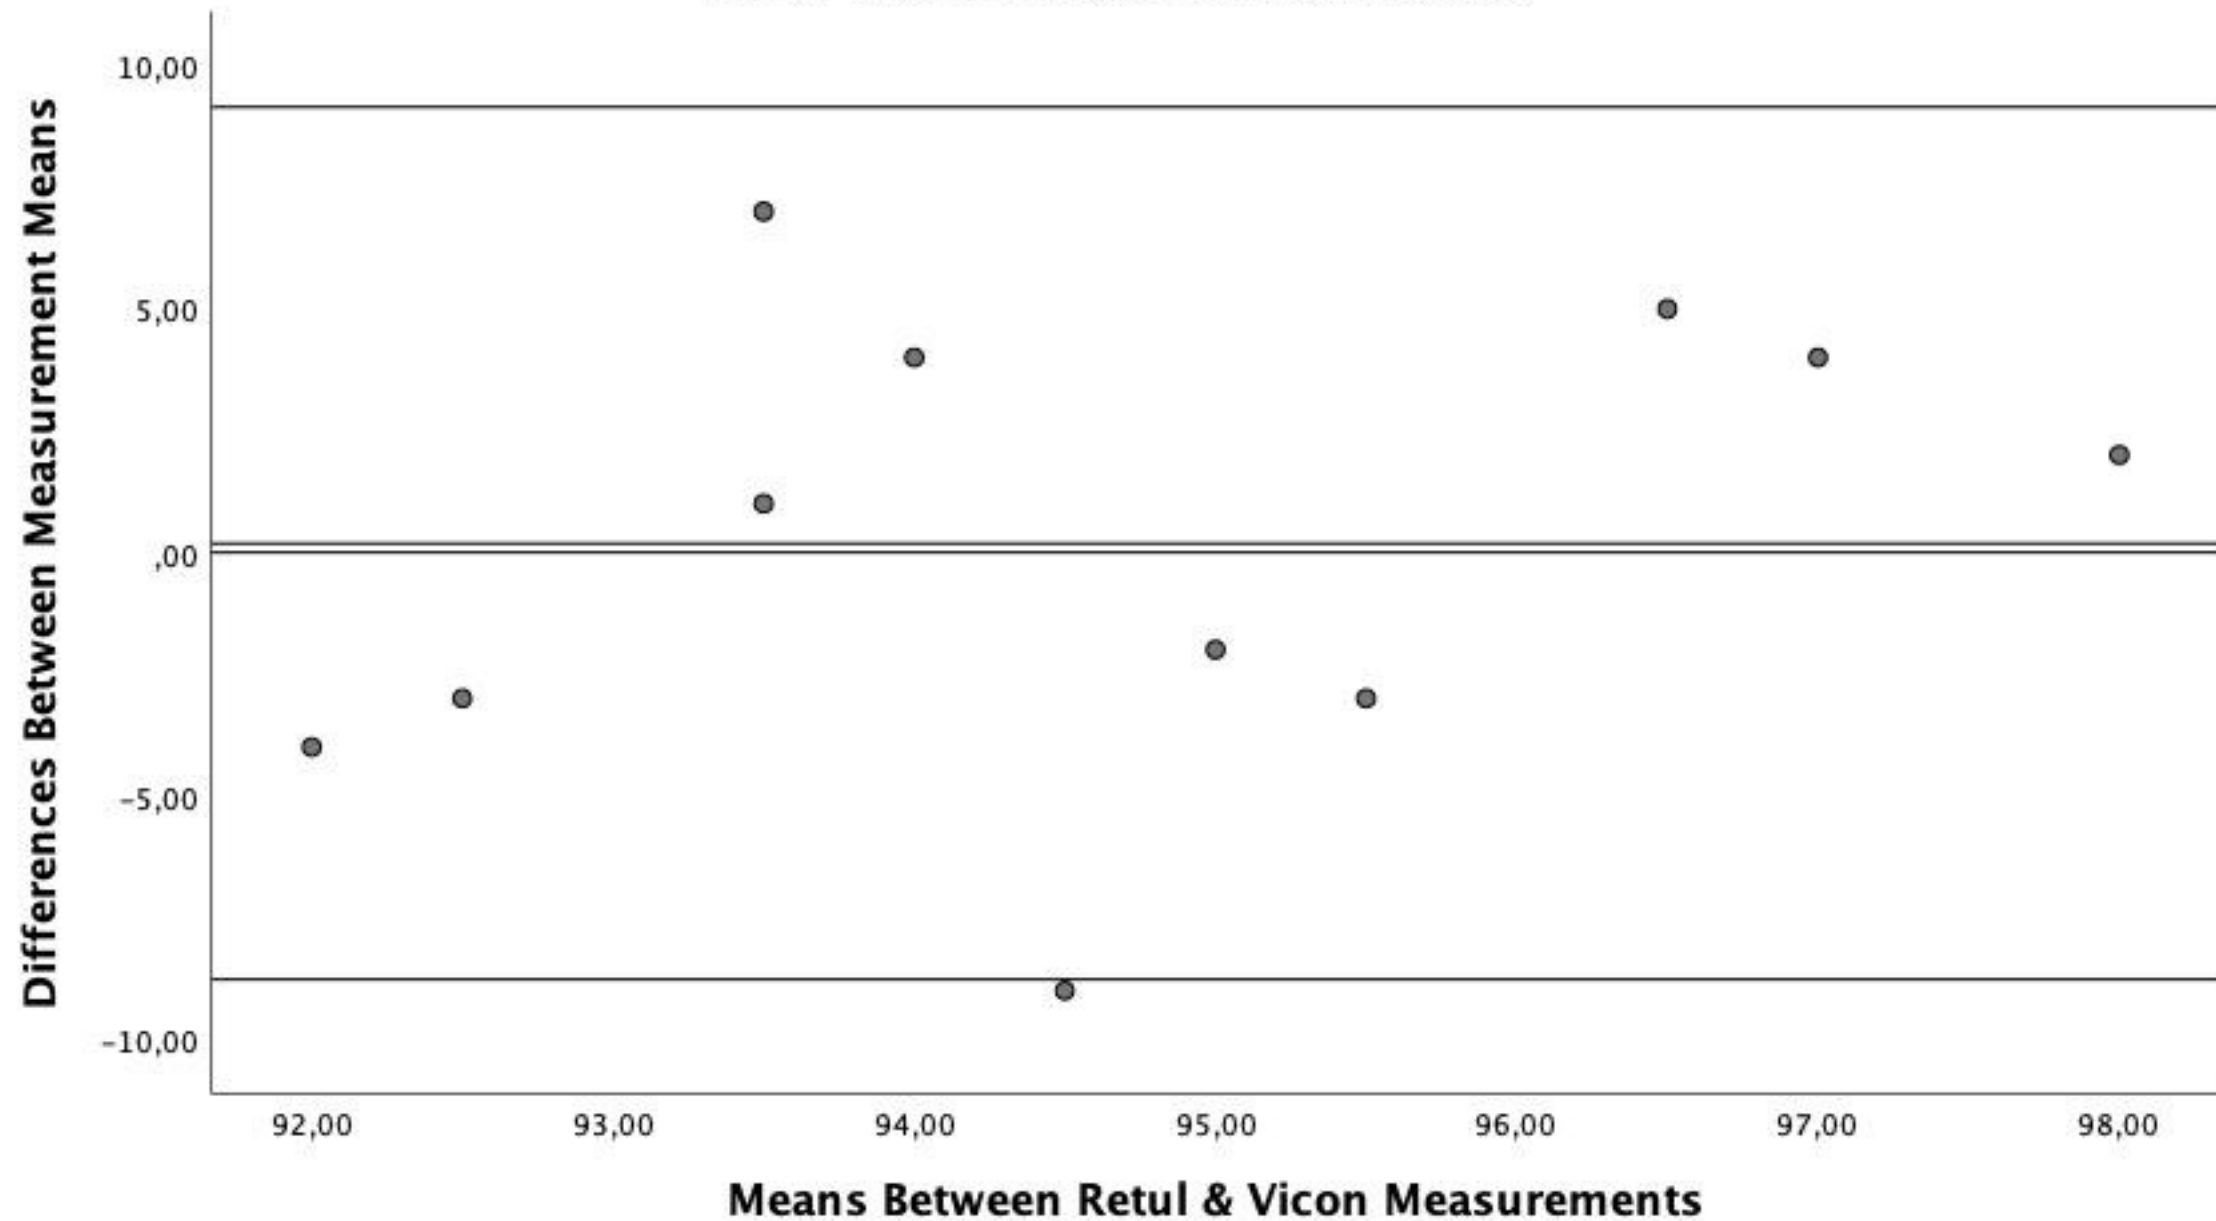

**Bland-Altman Plot 03: A.Range Variable**

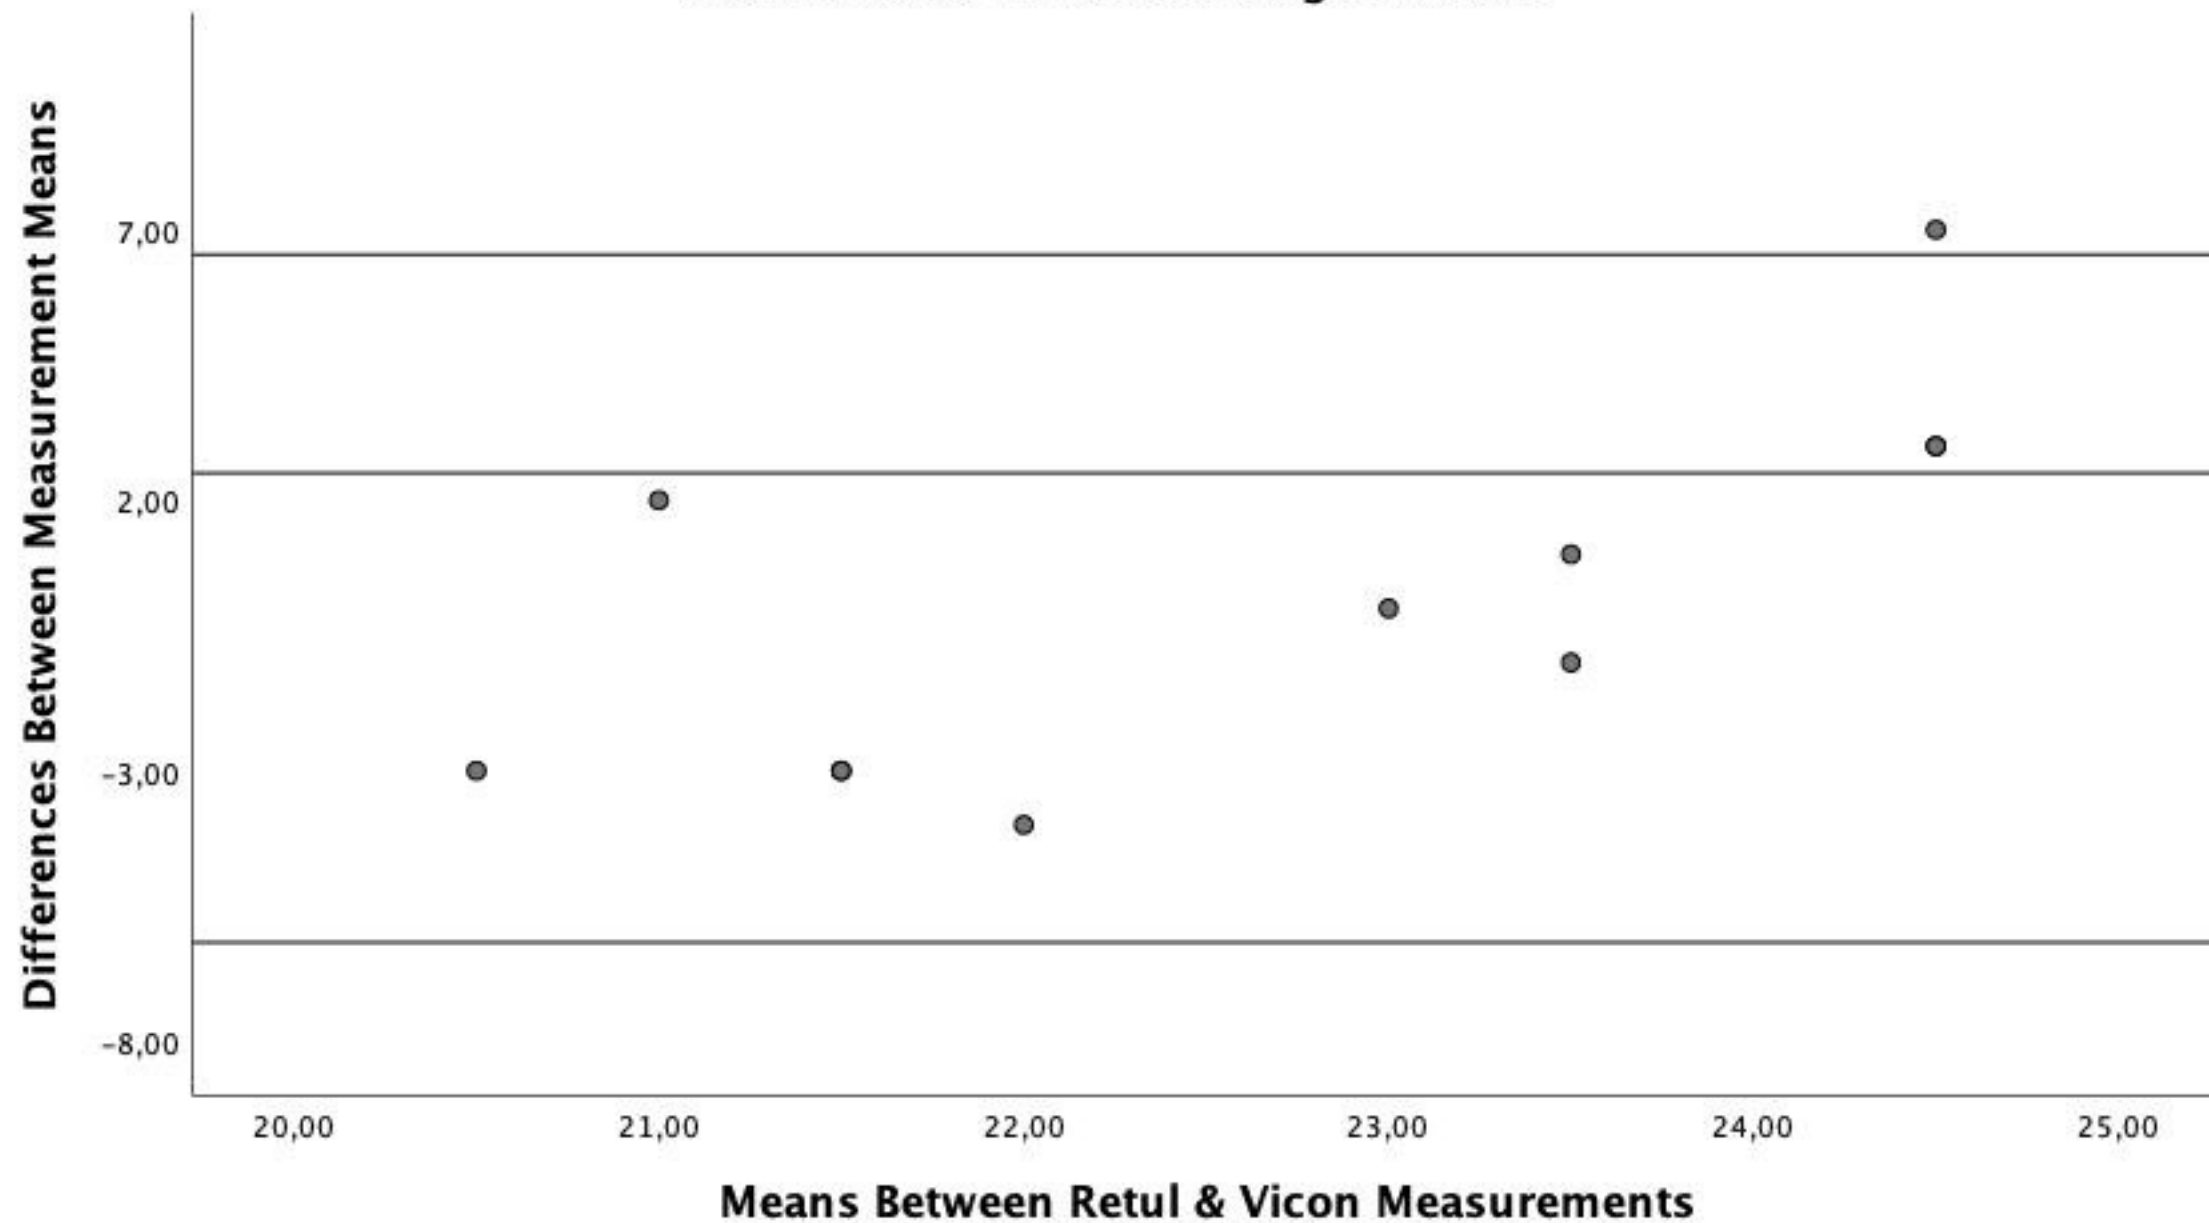

**Bland-Altman Plot 04: AA.Bottom Variable**

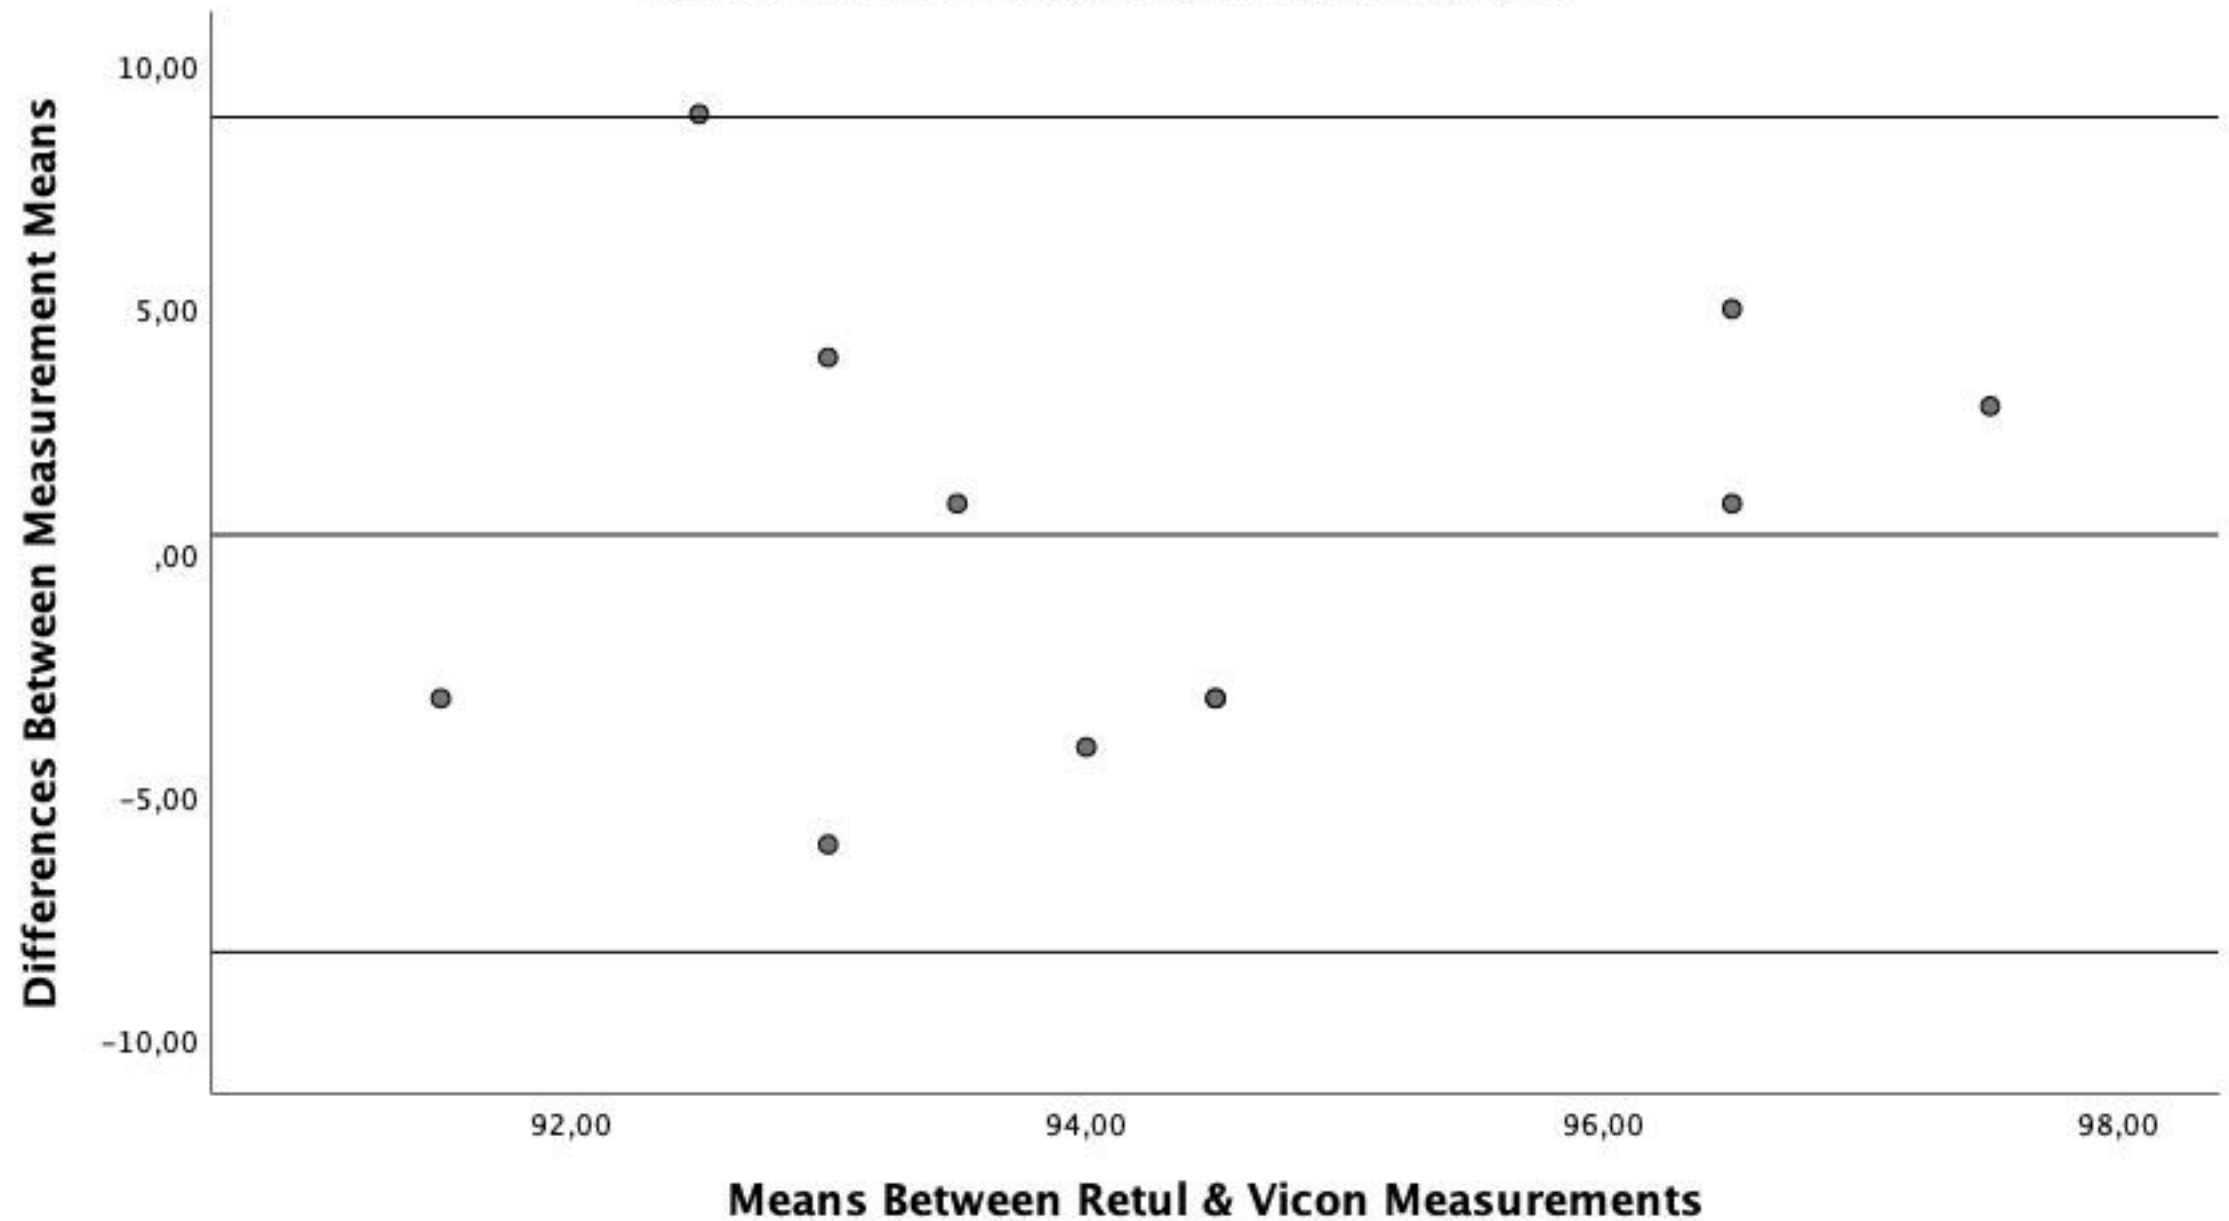

**Bland-Altman Plot 05: MKF Variable**

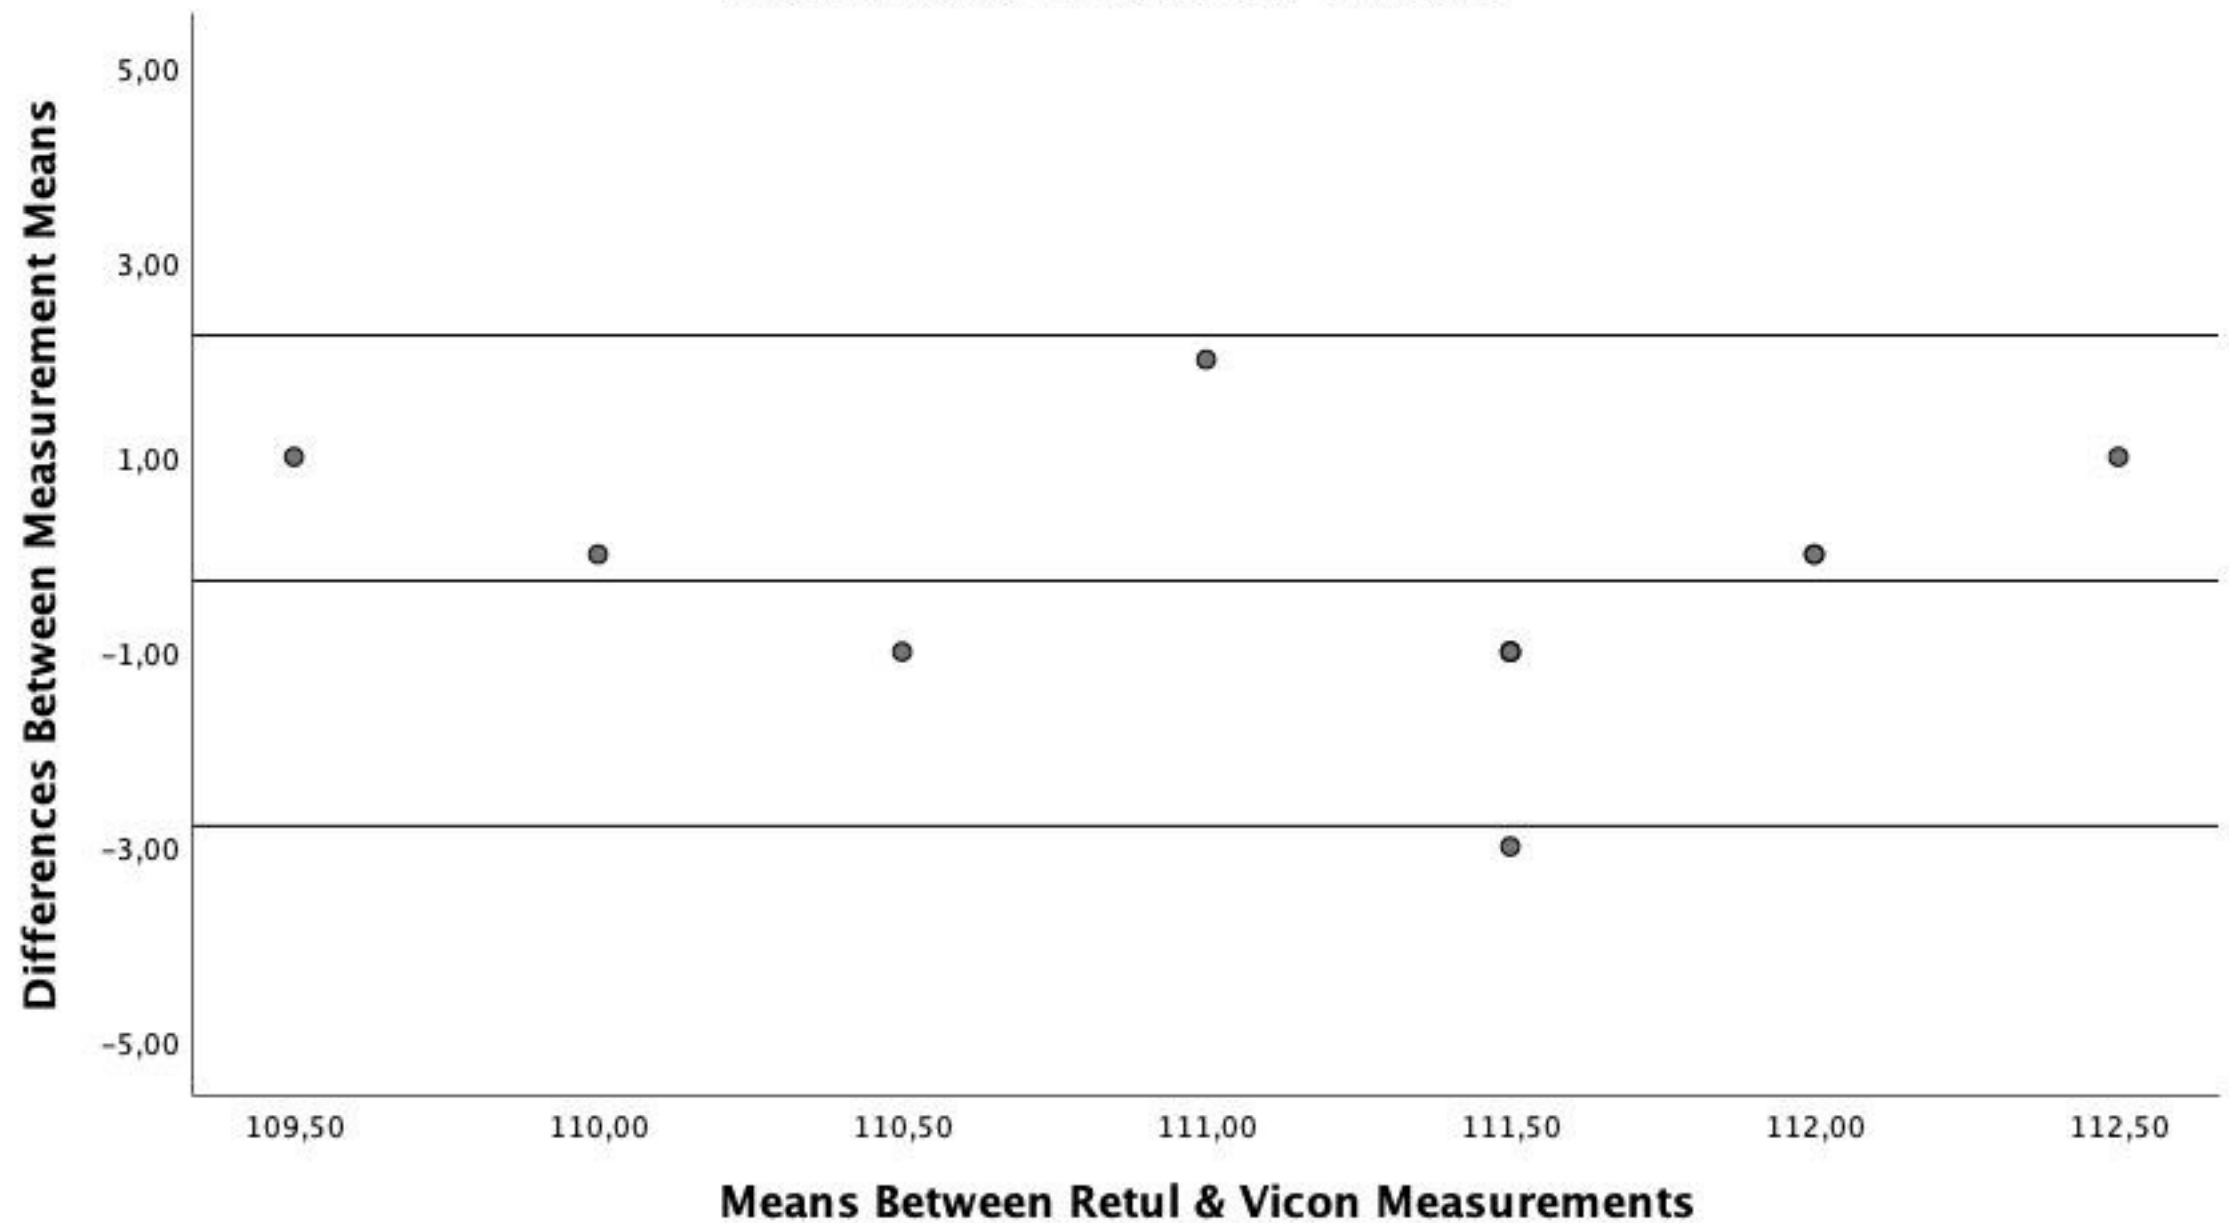

**Bland-Altman Plot 06: MKE Variable**

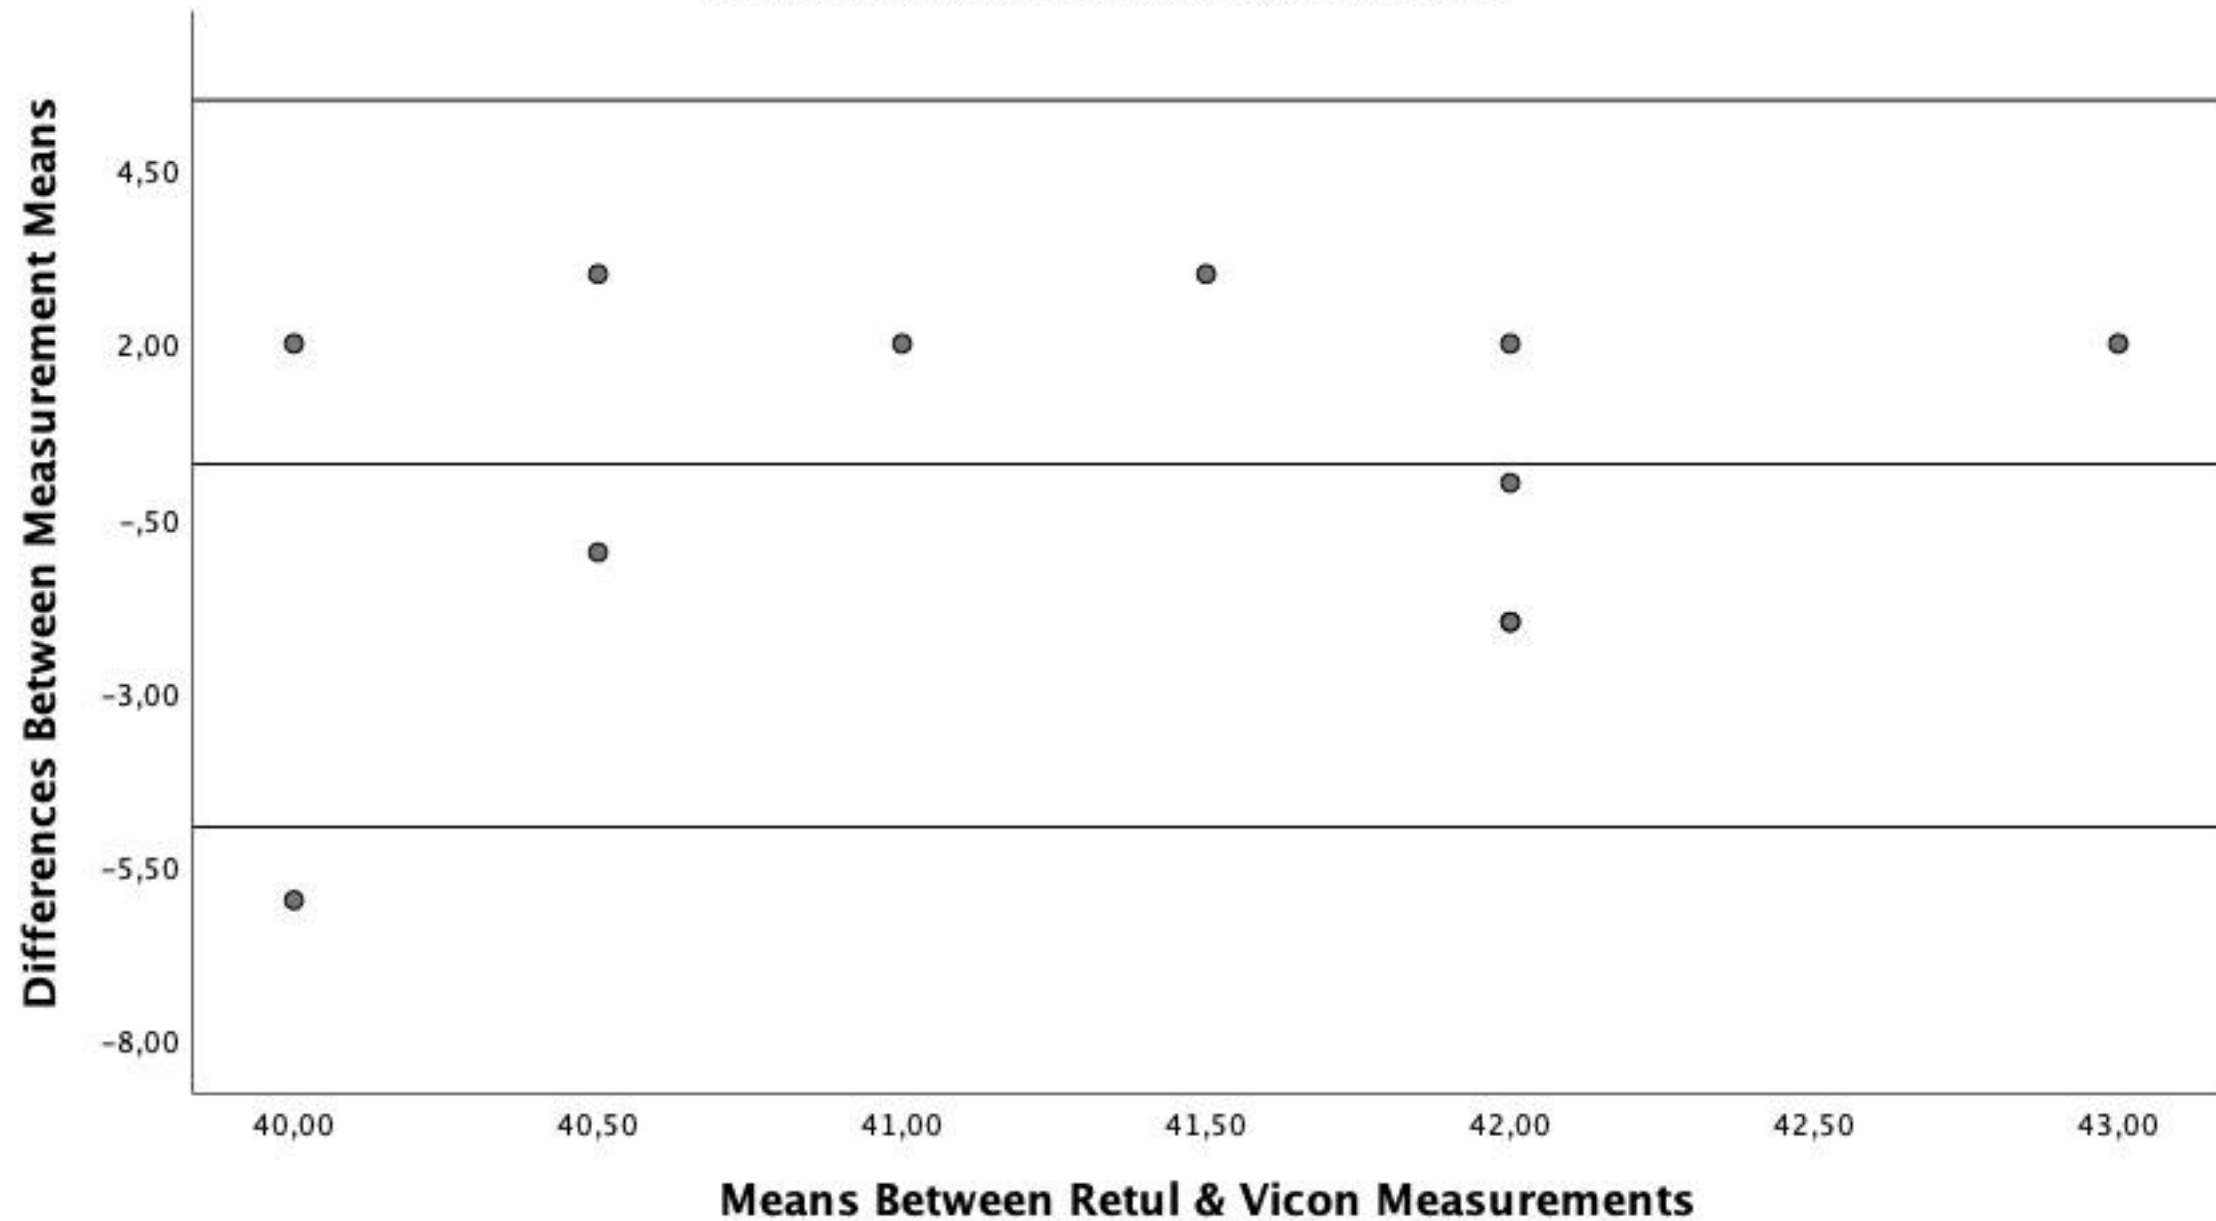

**Bland-Altman Plot 07: KAR Variables**

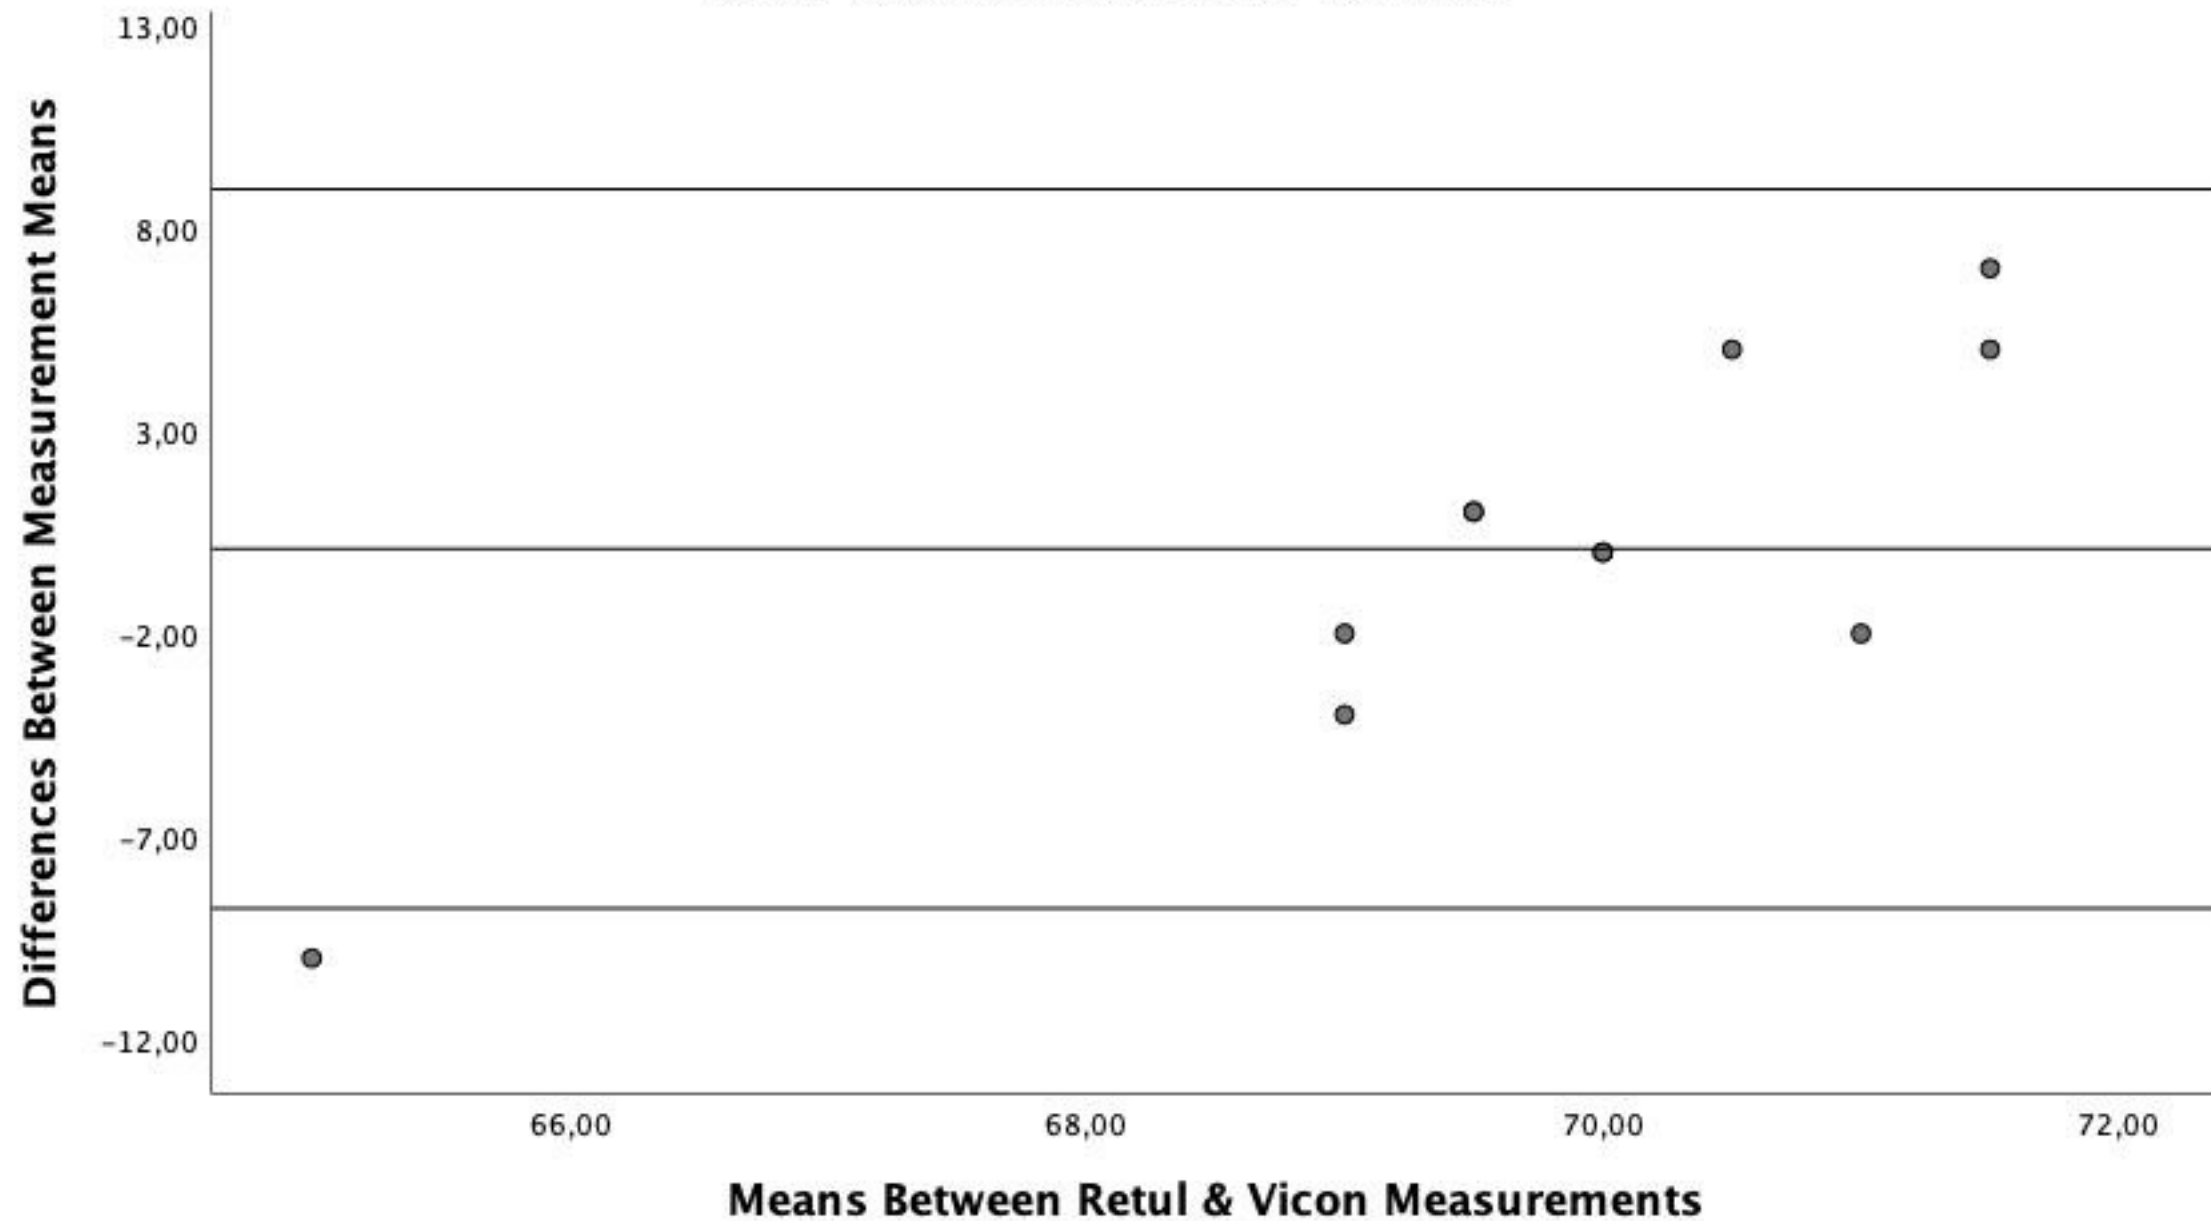

**Bland-Altman Plot 08: HAC Variable**

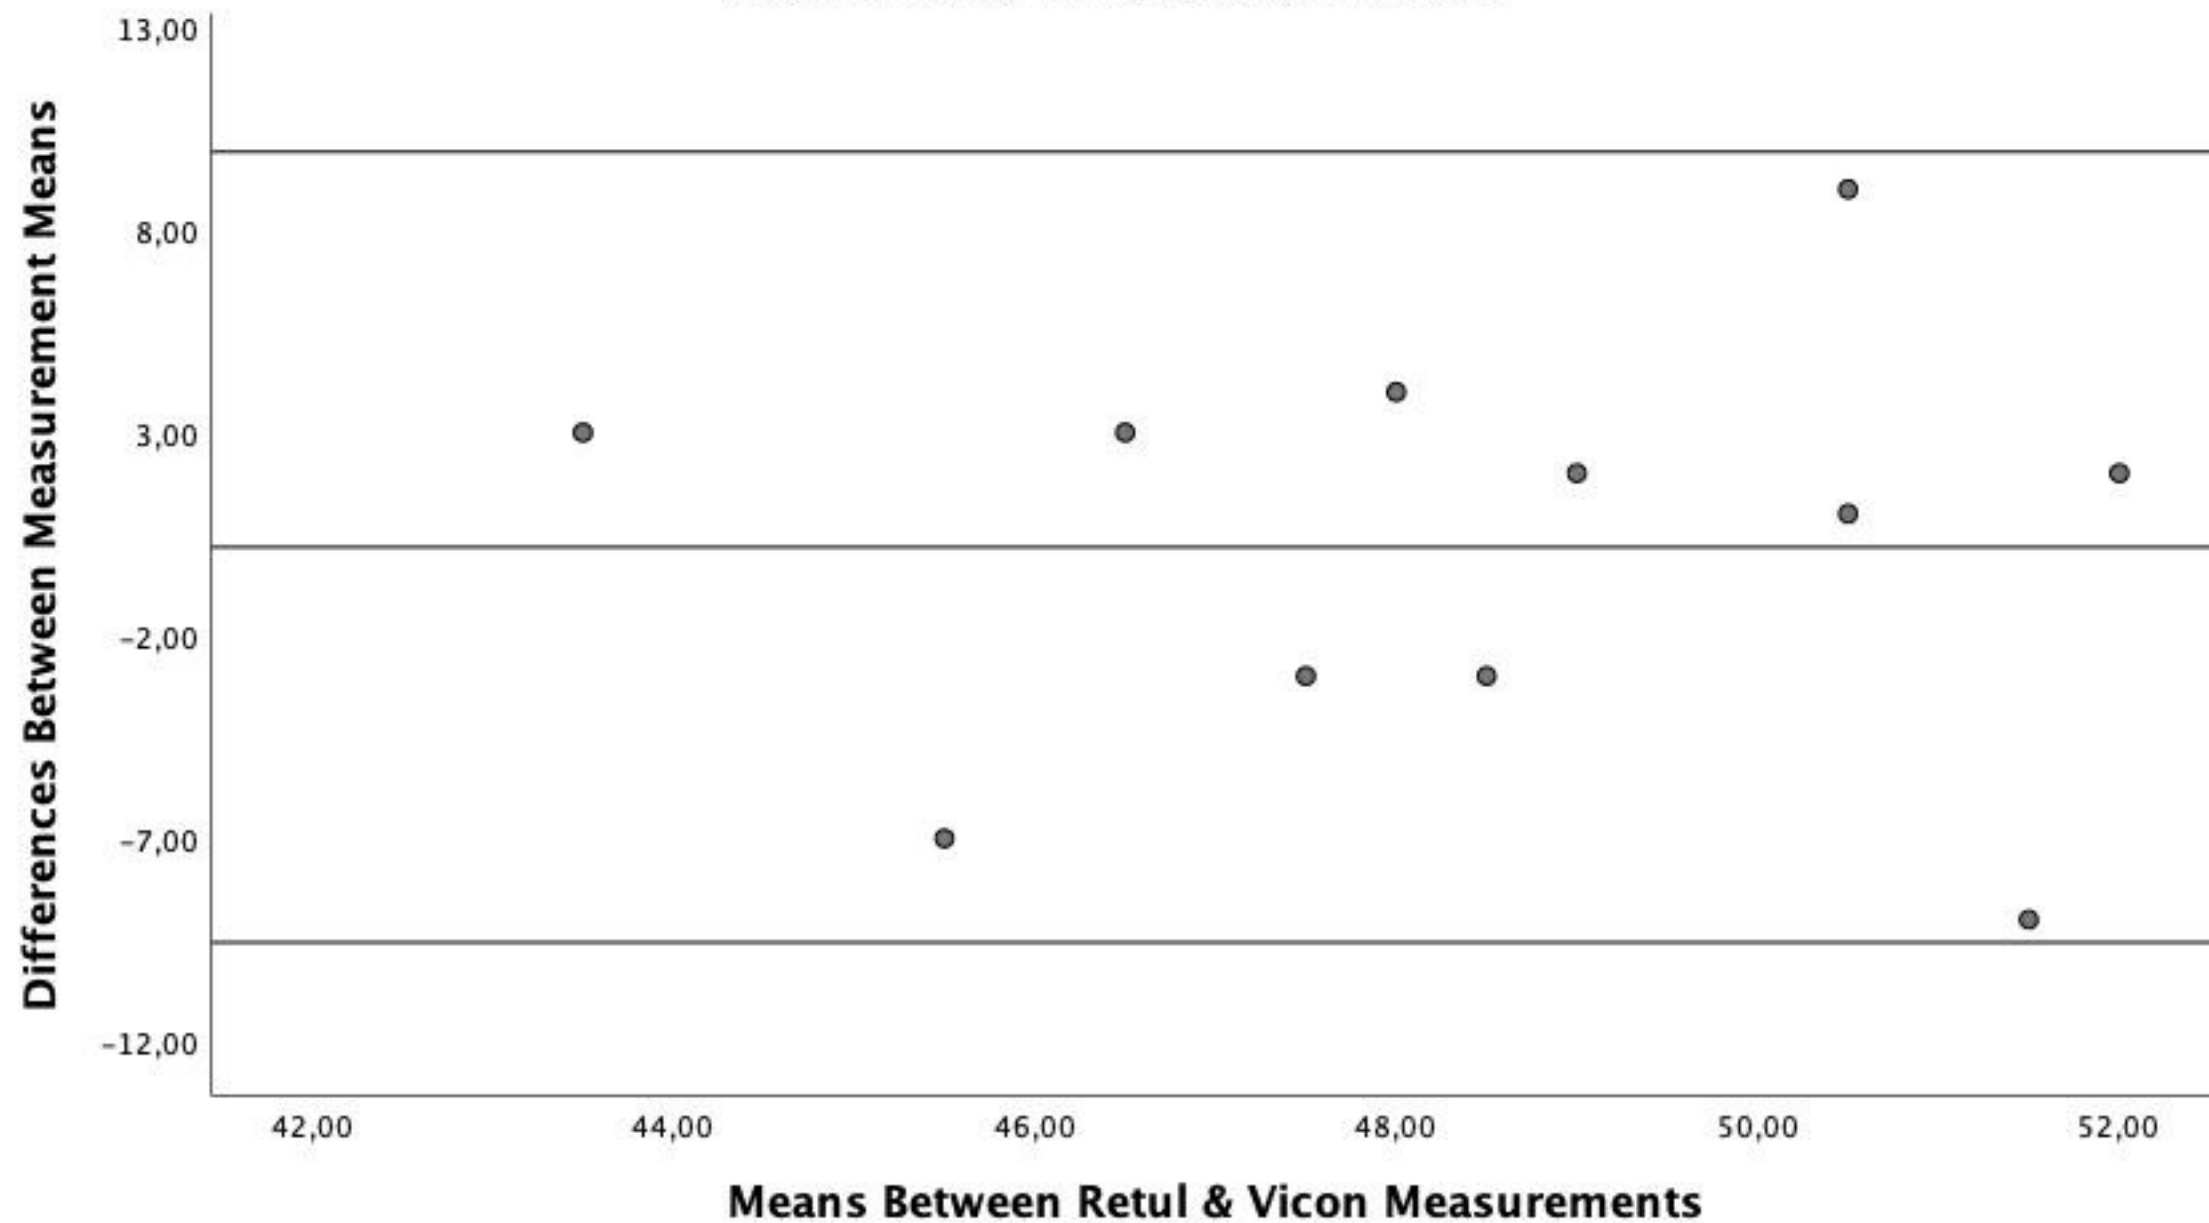



**Bland-Altman Plot 09: HAO Variable**

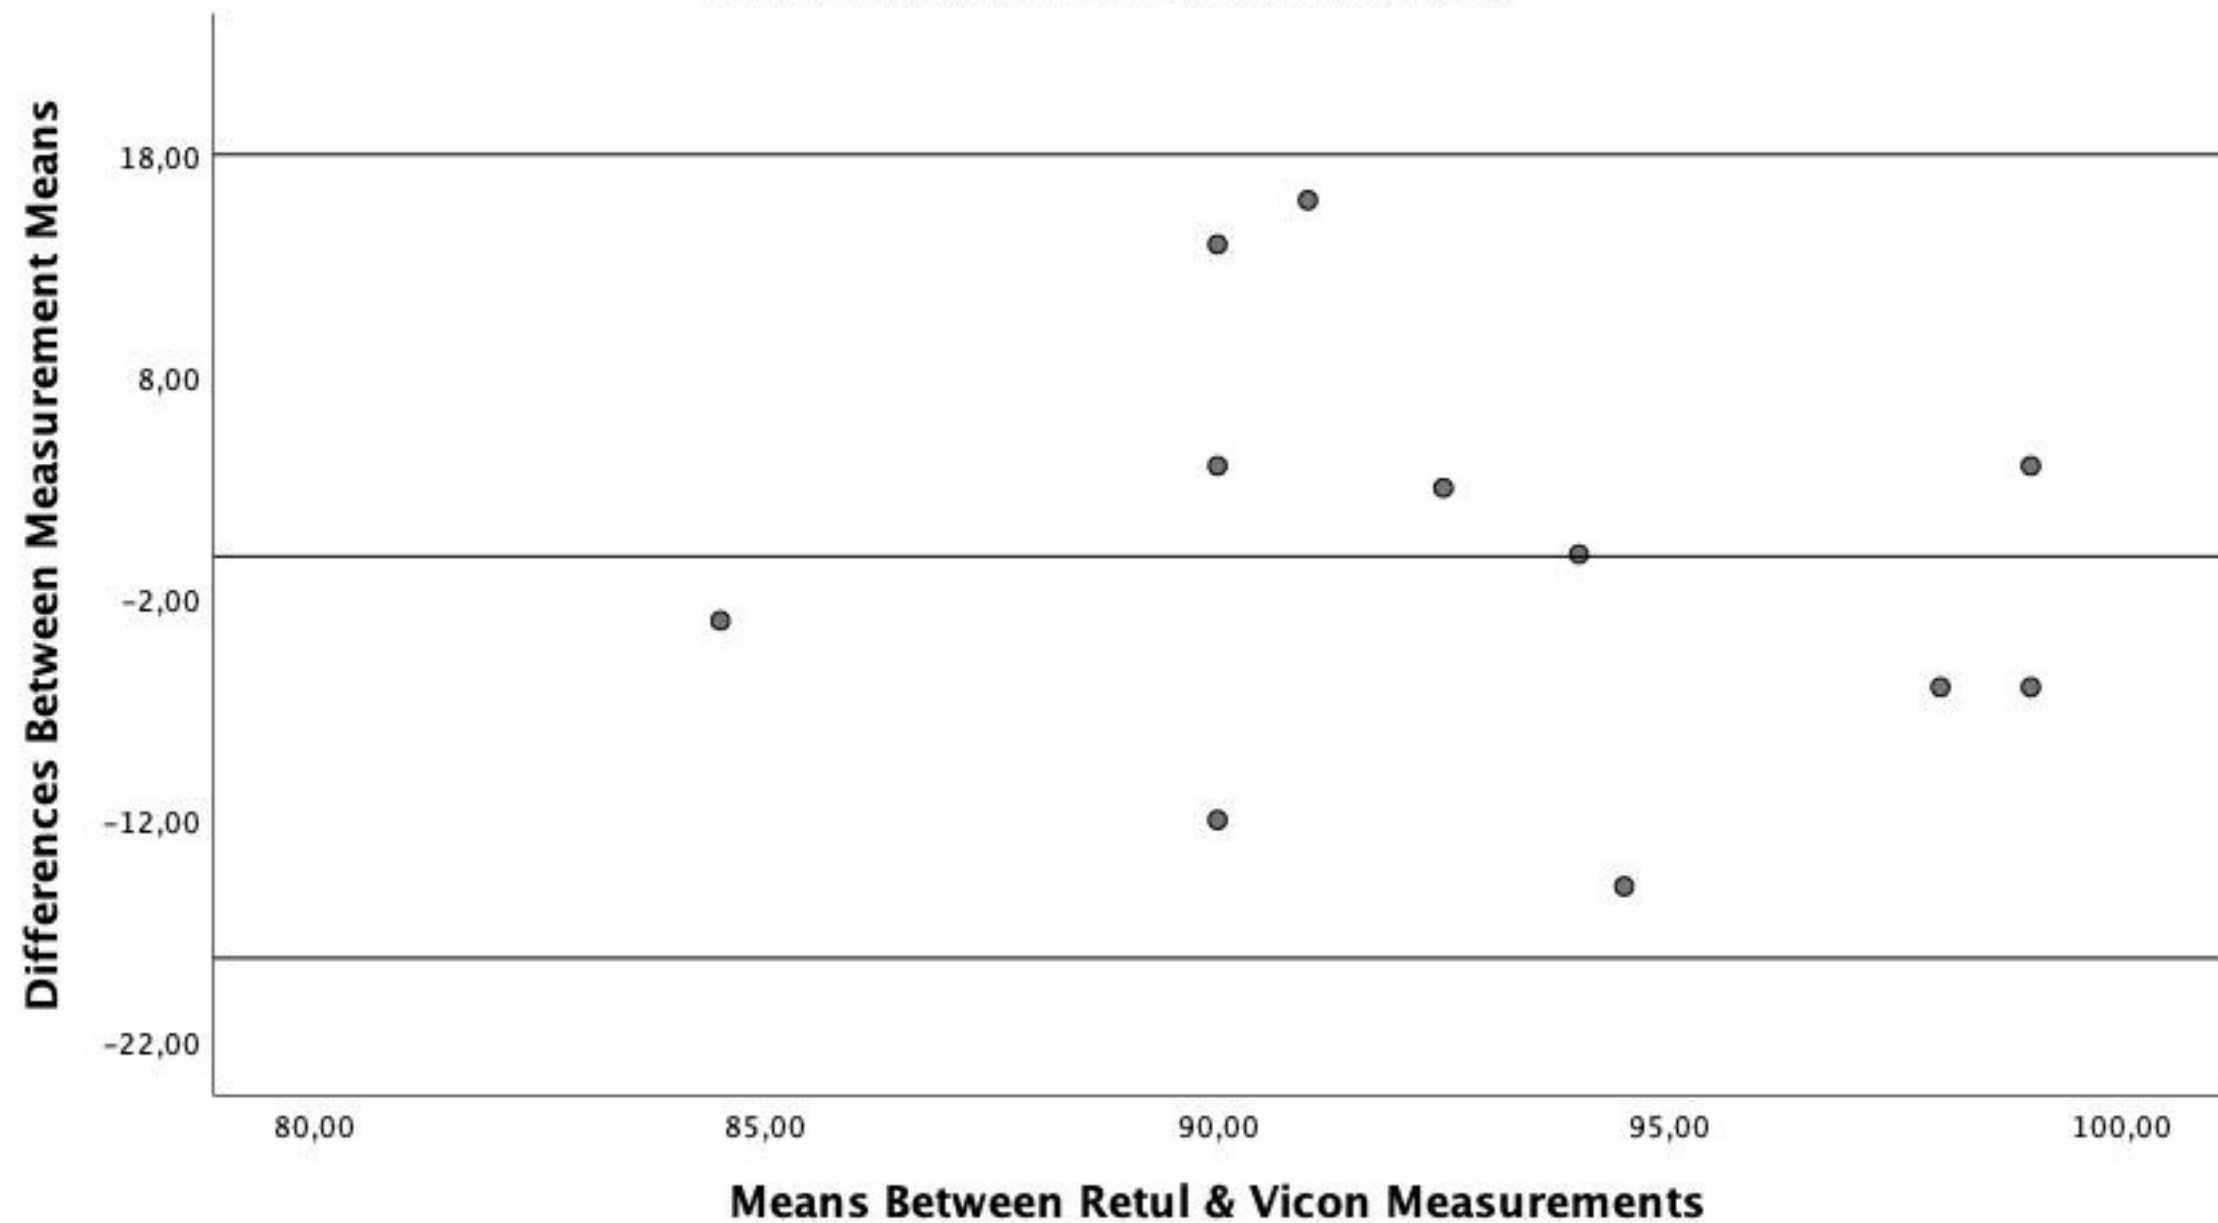

**Bland-Altman Plot 10: HAR Variable**

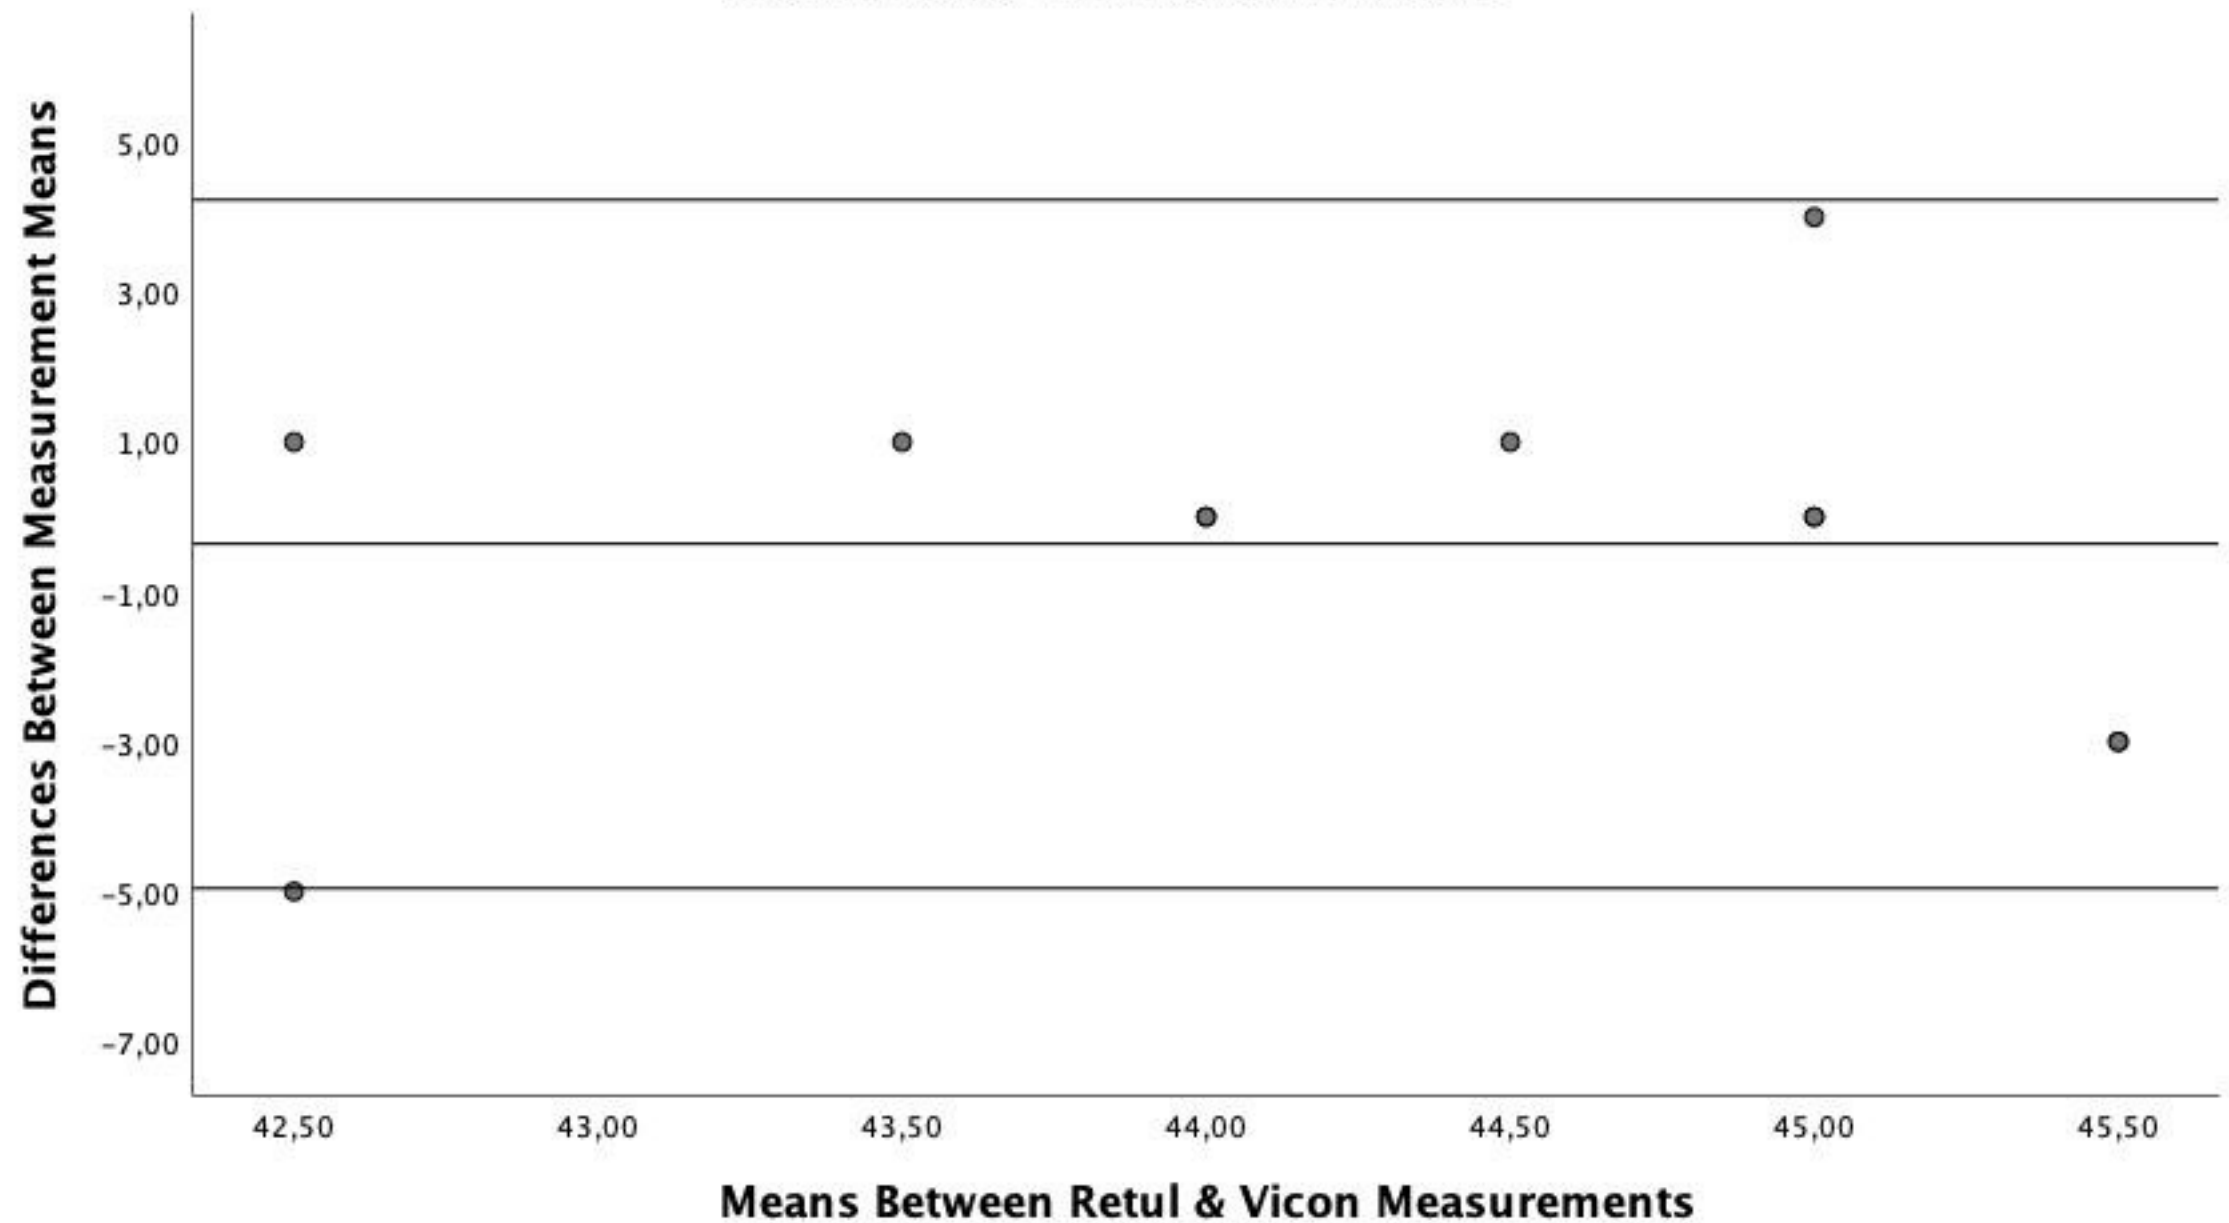

**Bland-Altman Plot 11: BA Variable**

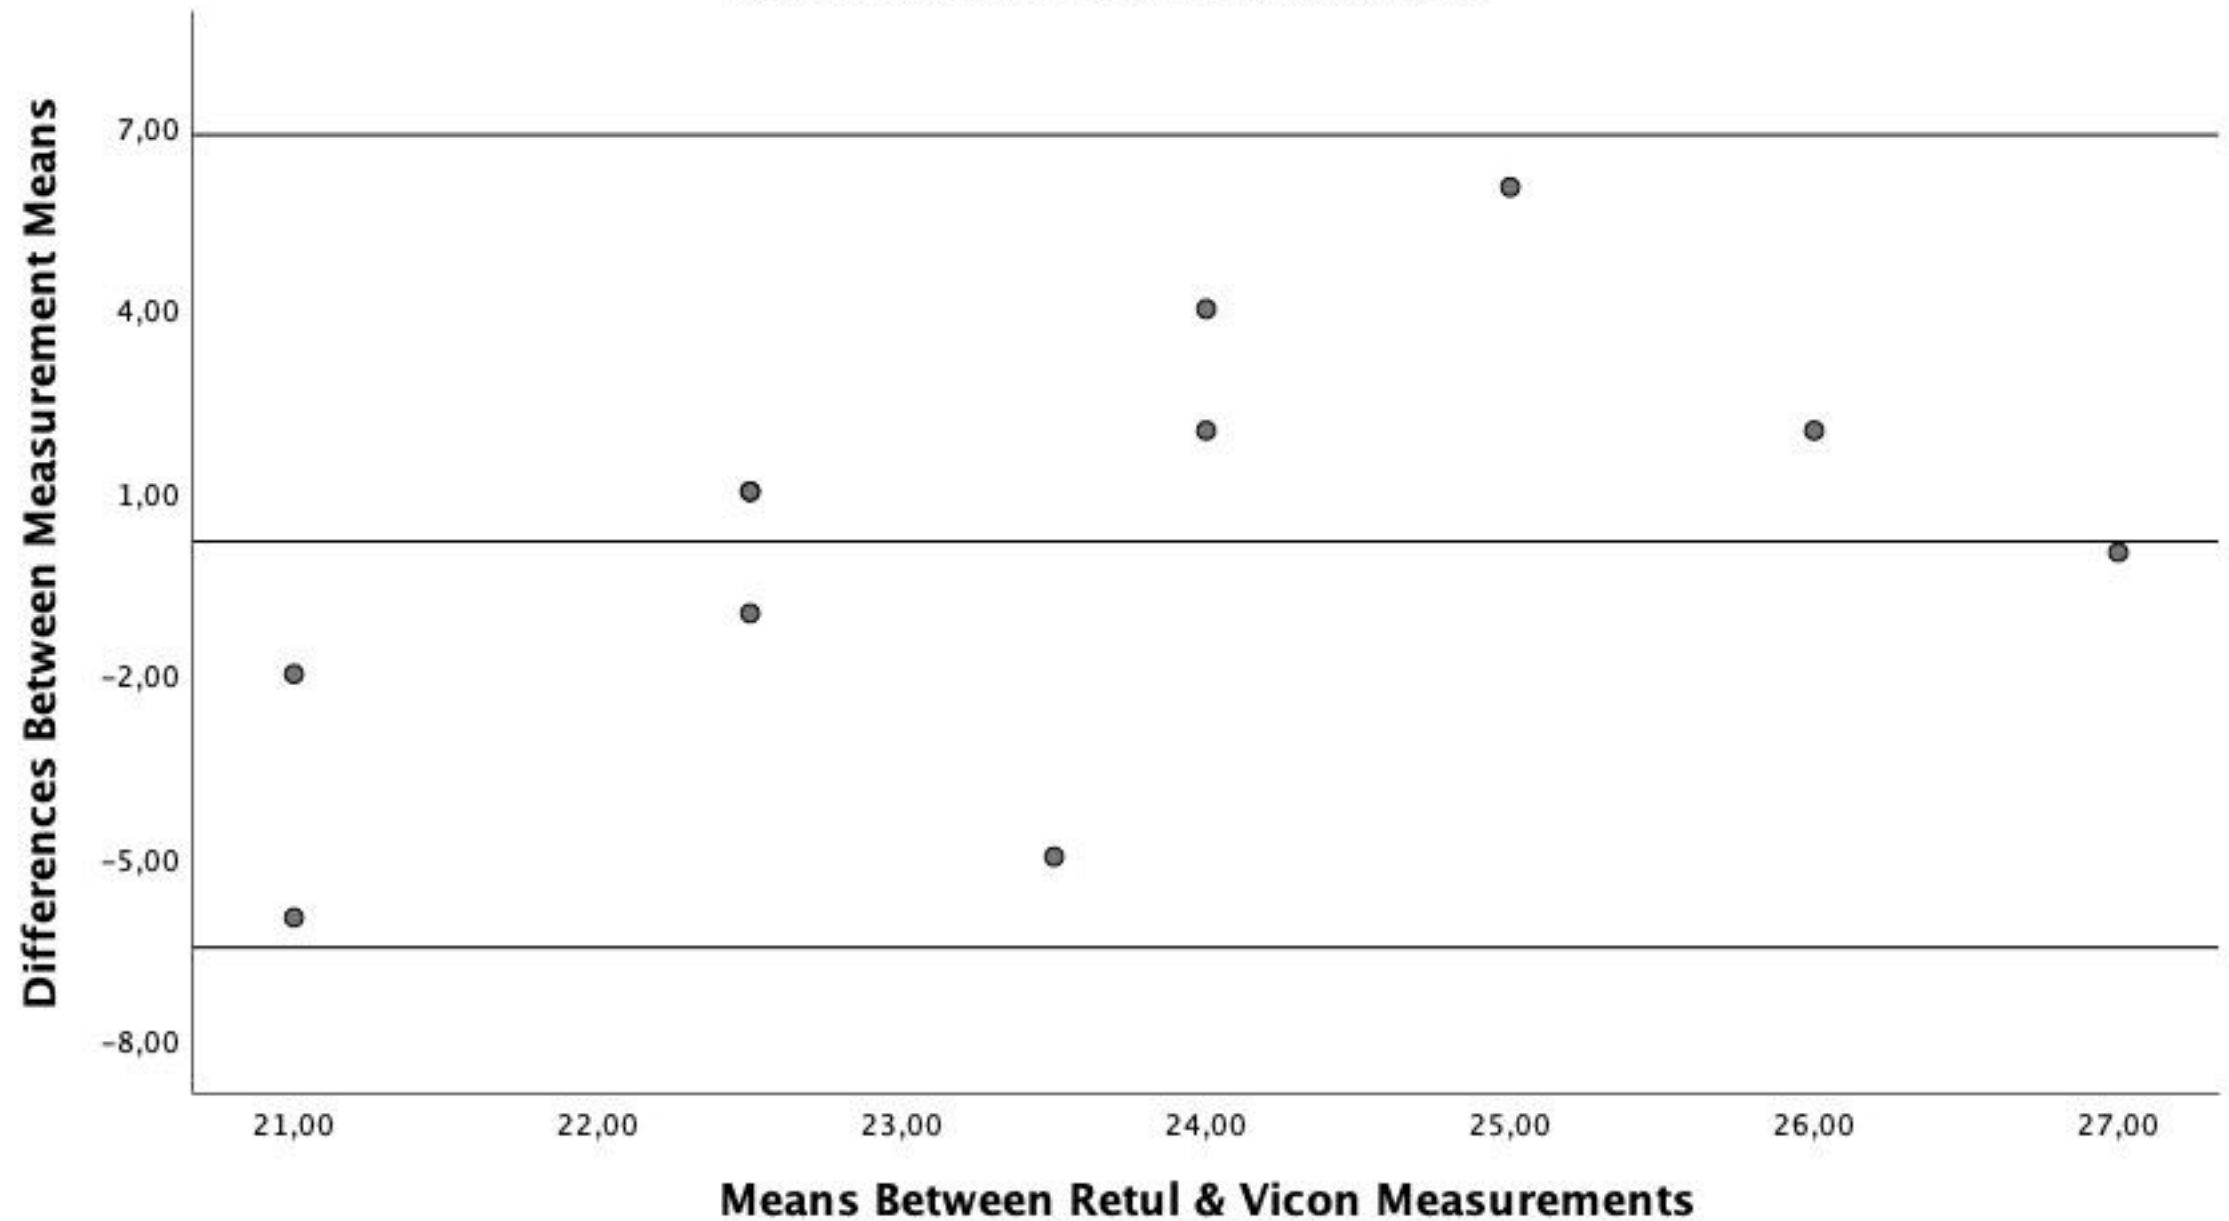

**Bland-Altman Plot 12: SAW Variable**

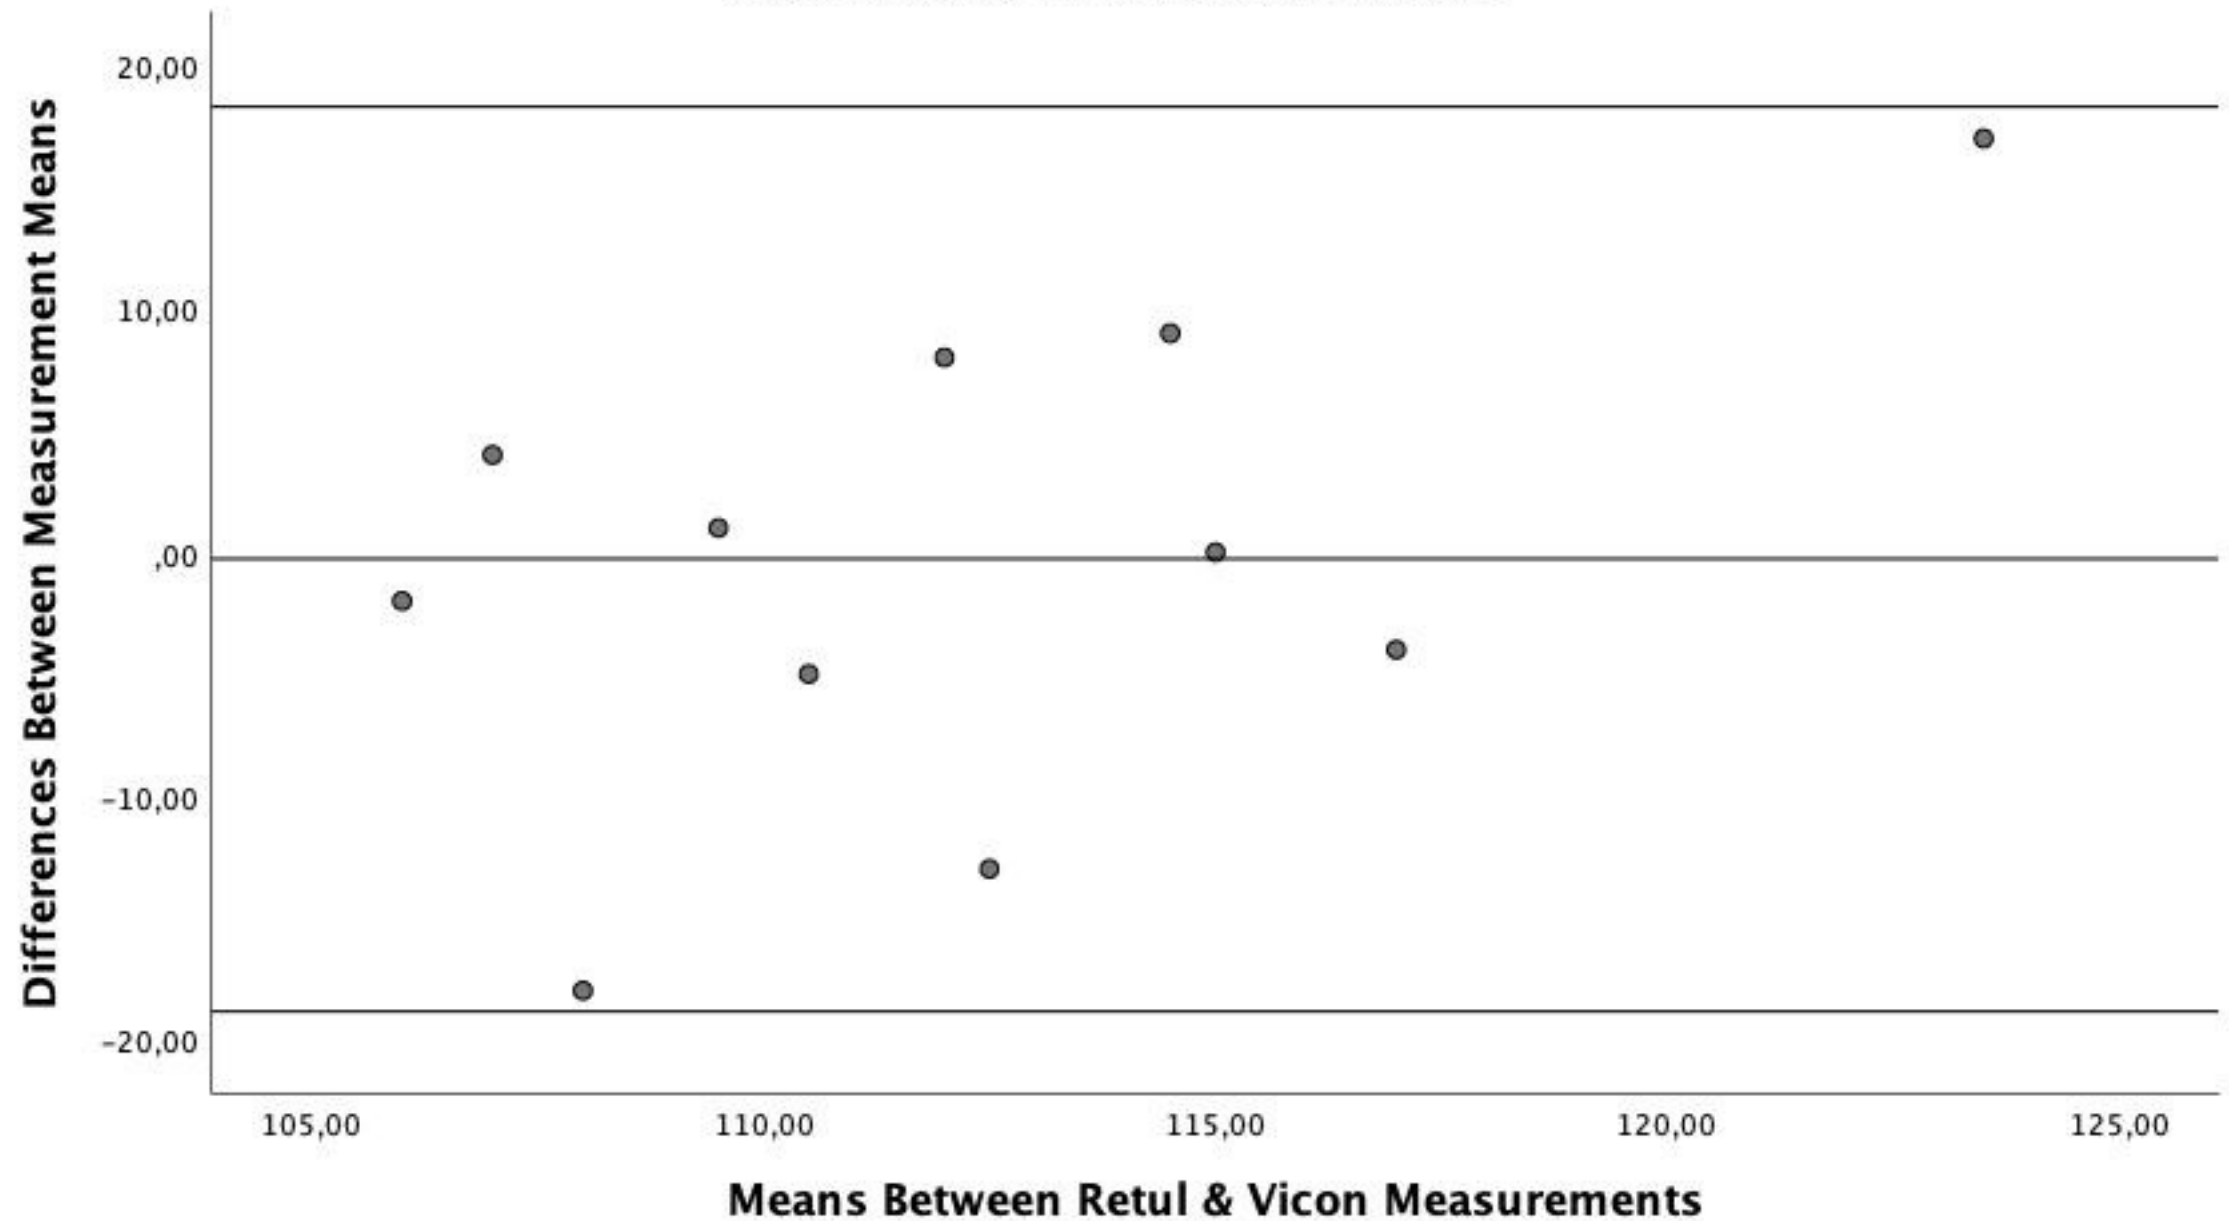

**Bland-Altman Plot 13: SAE Variable**

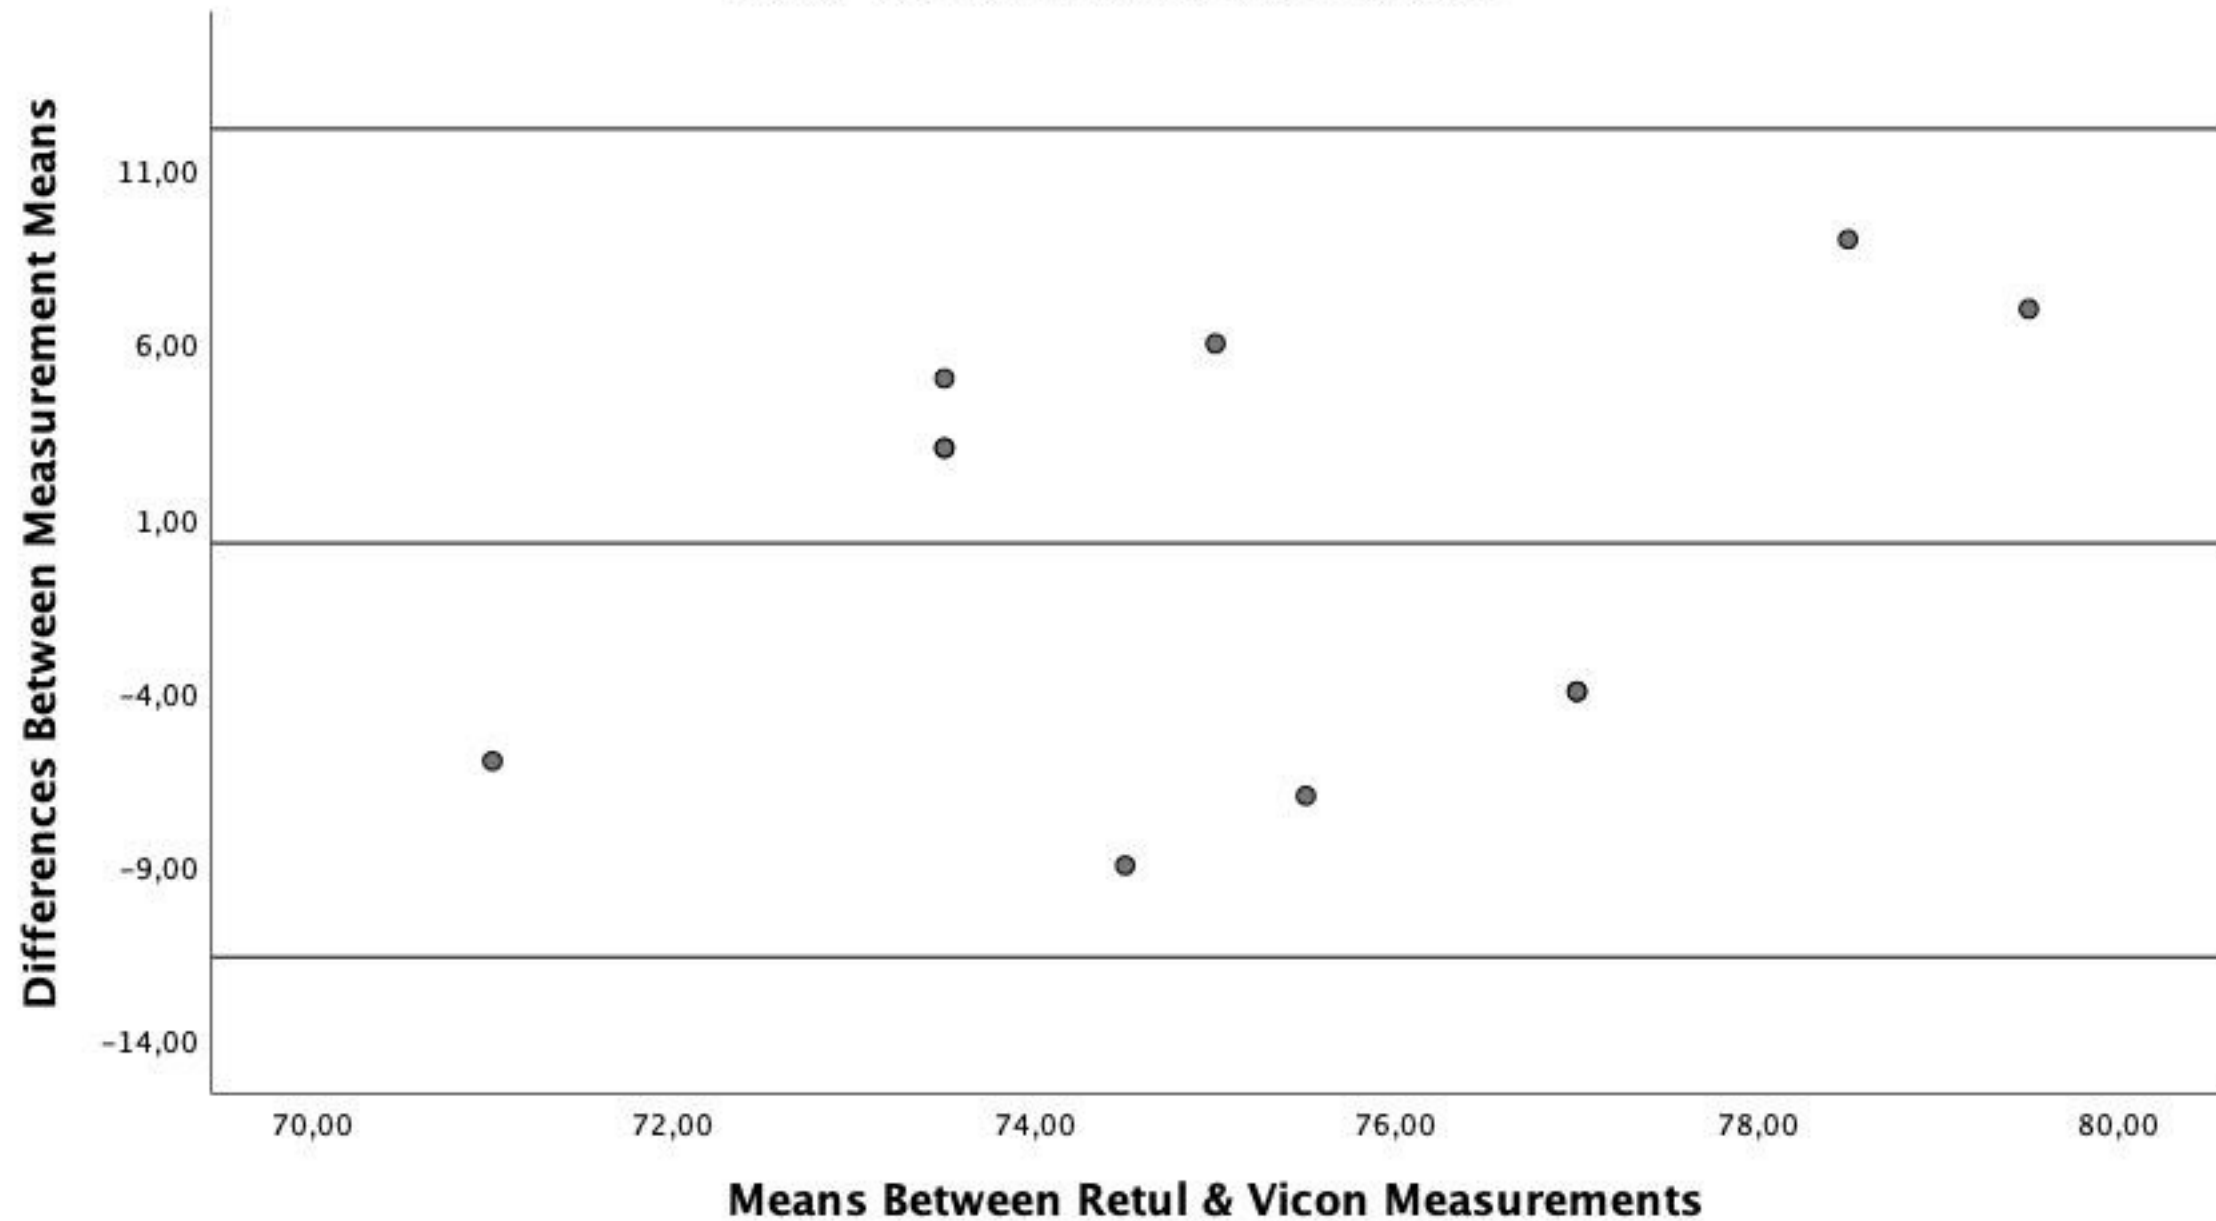

**Bland-Altman Plot 14: KFF Variable**

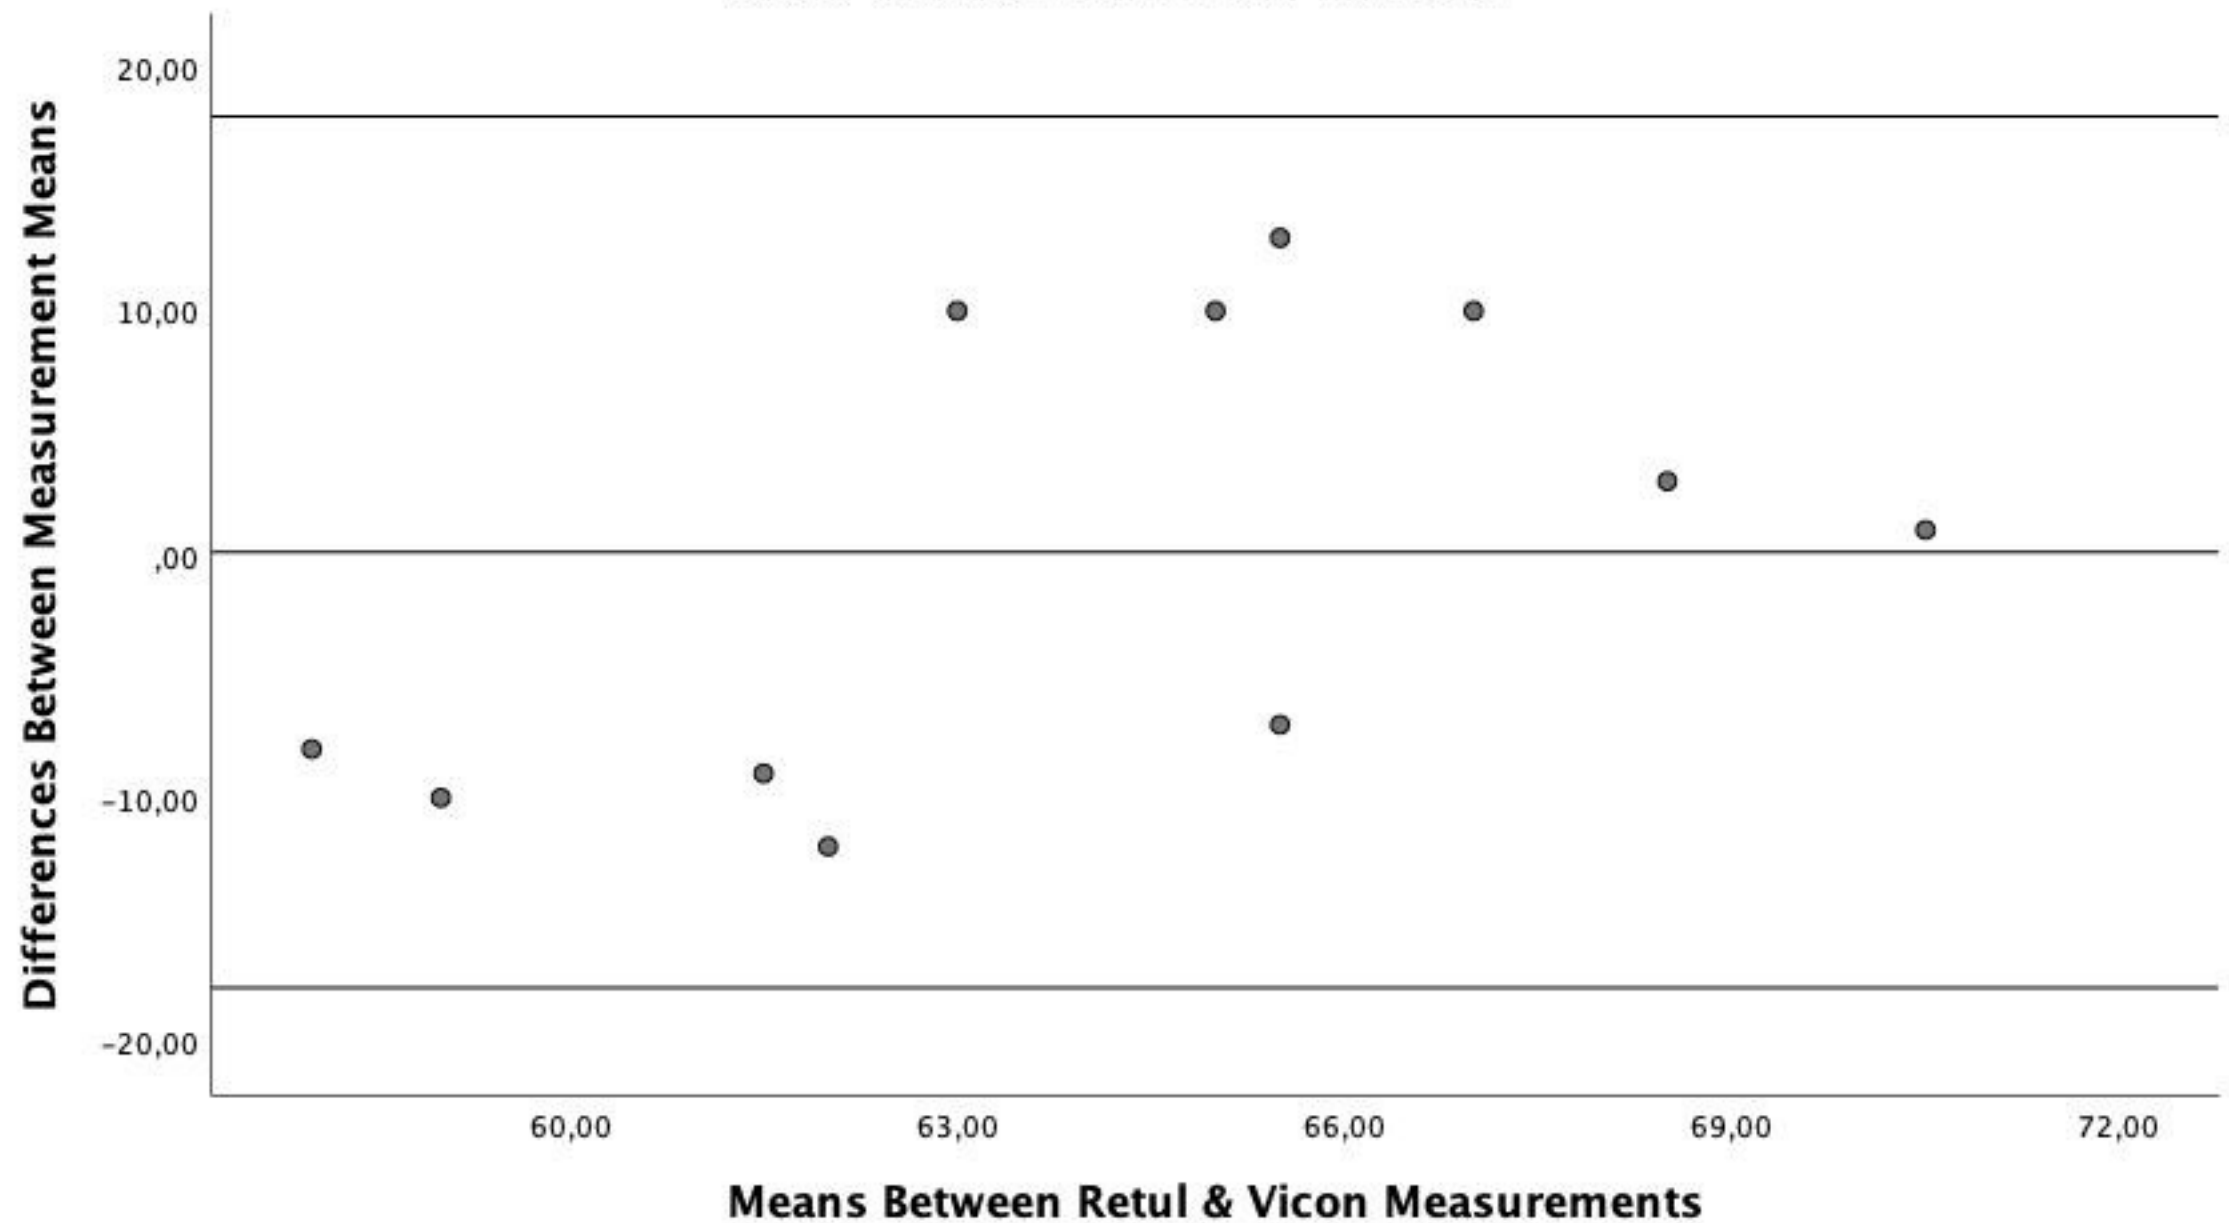

**Bland-Altman Plot 15: KFS Variable**

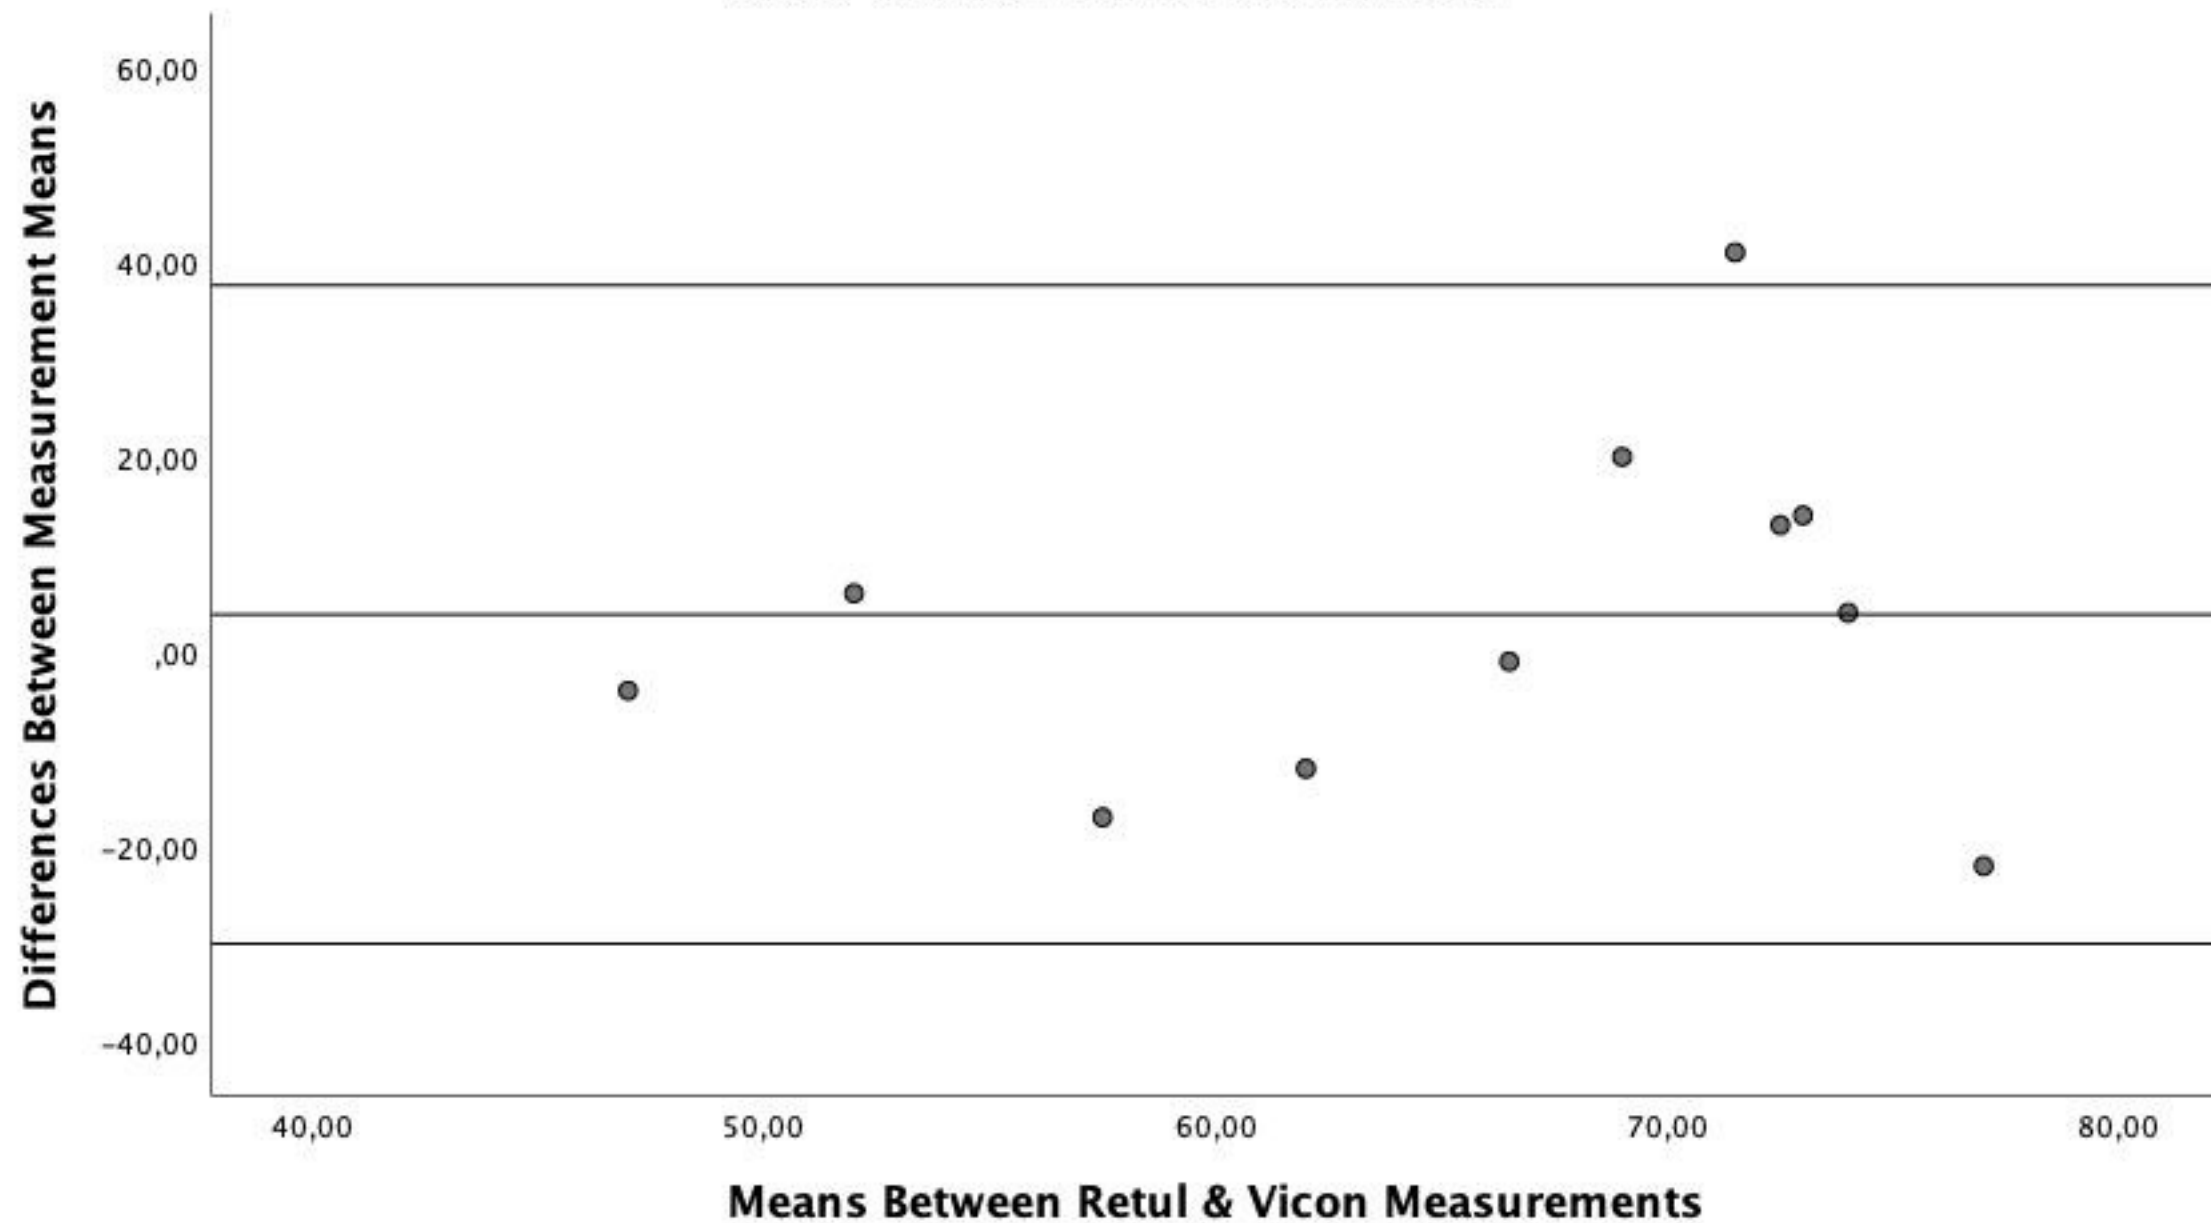

**Bland-Altman Plot 16: KTT Variable**

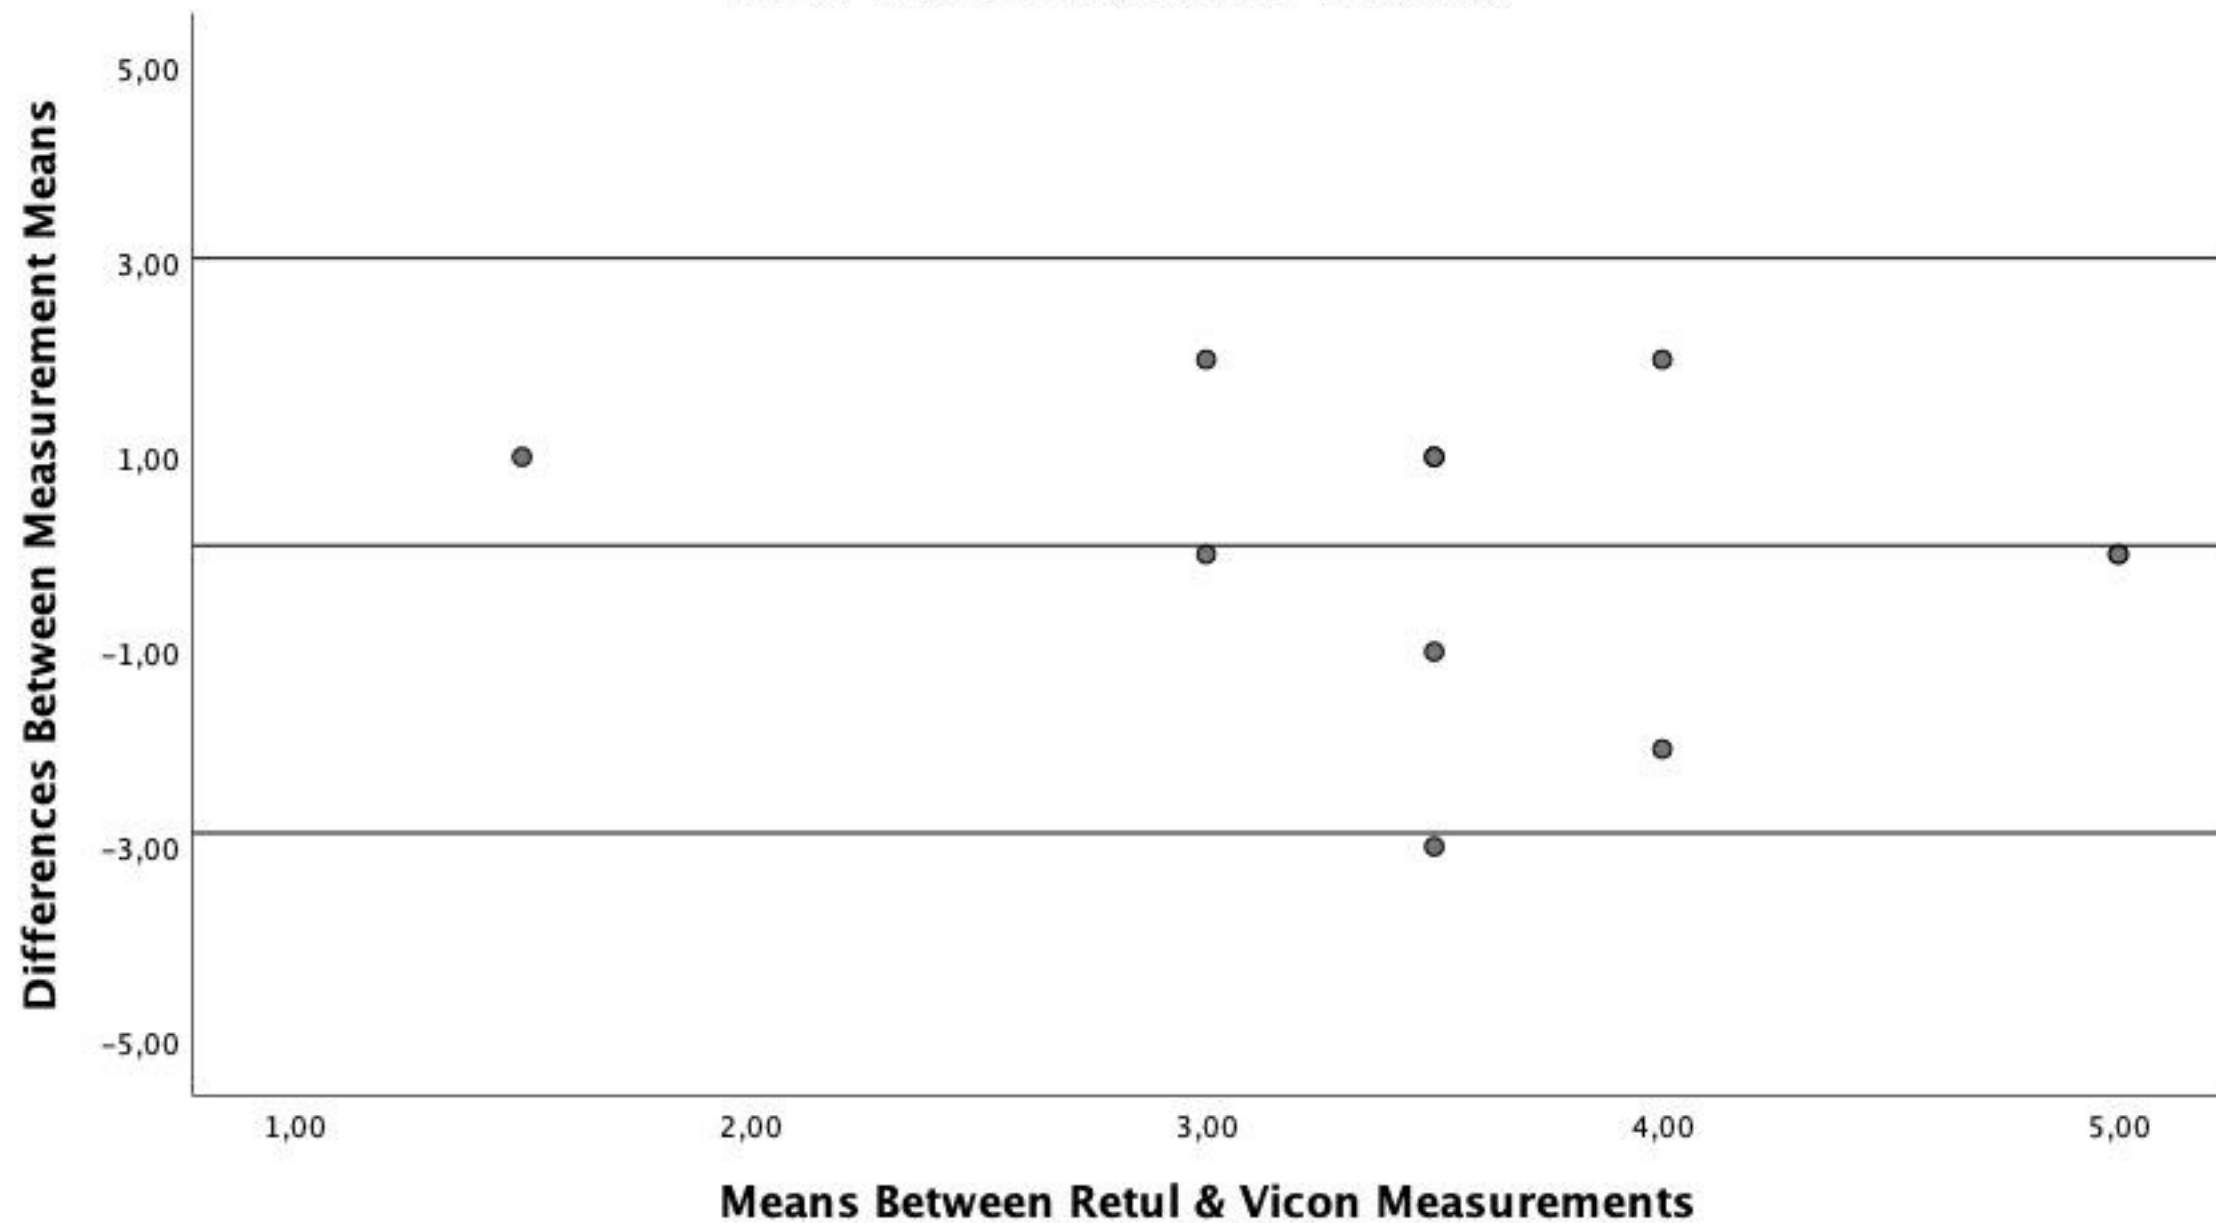



**Bland-Altman Plot 17: KLT Variable**

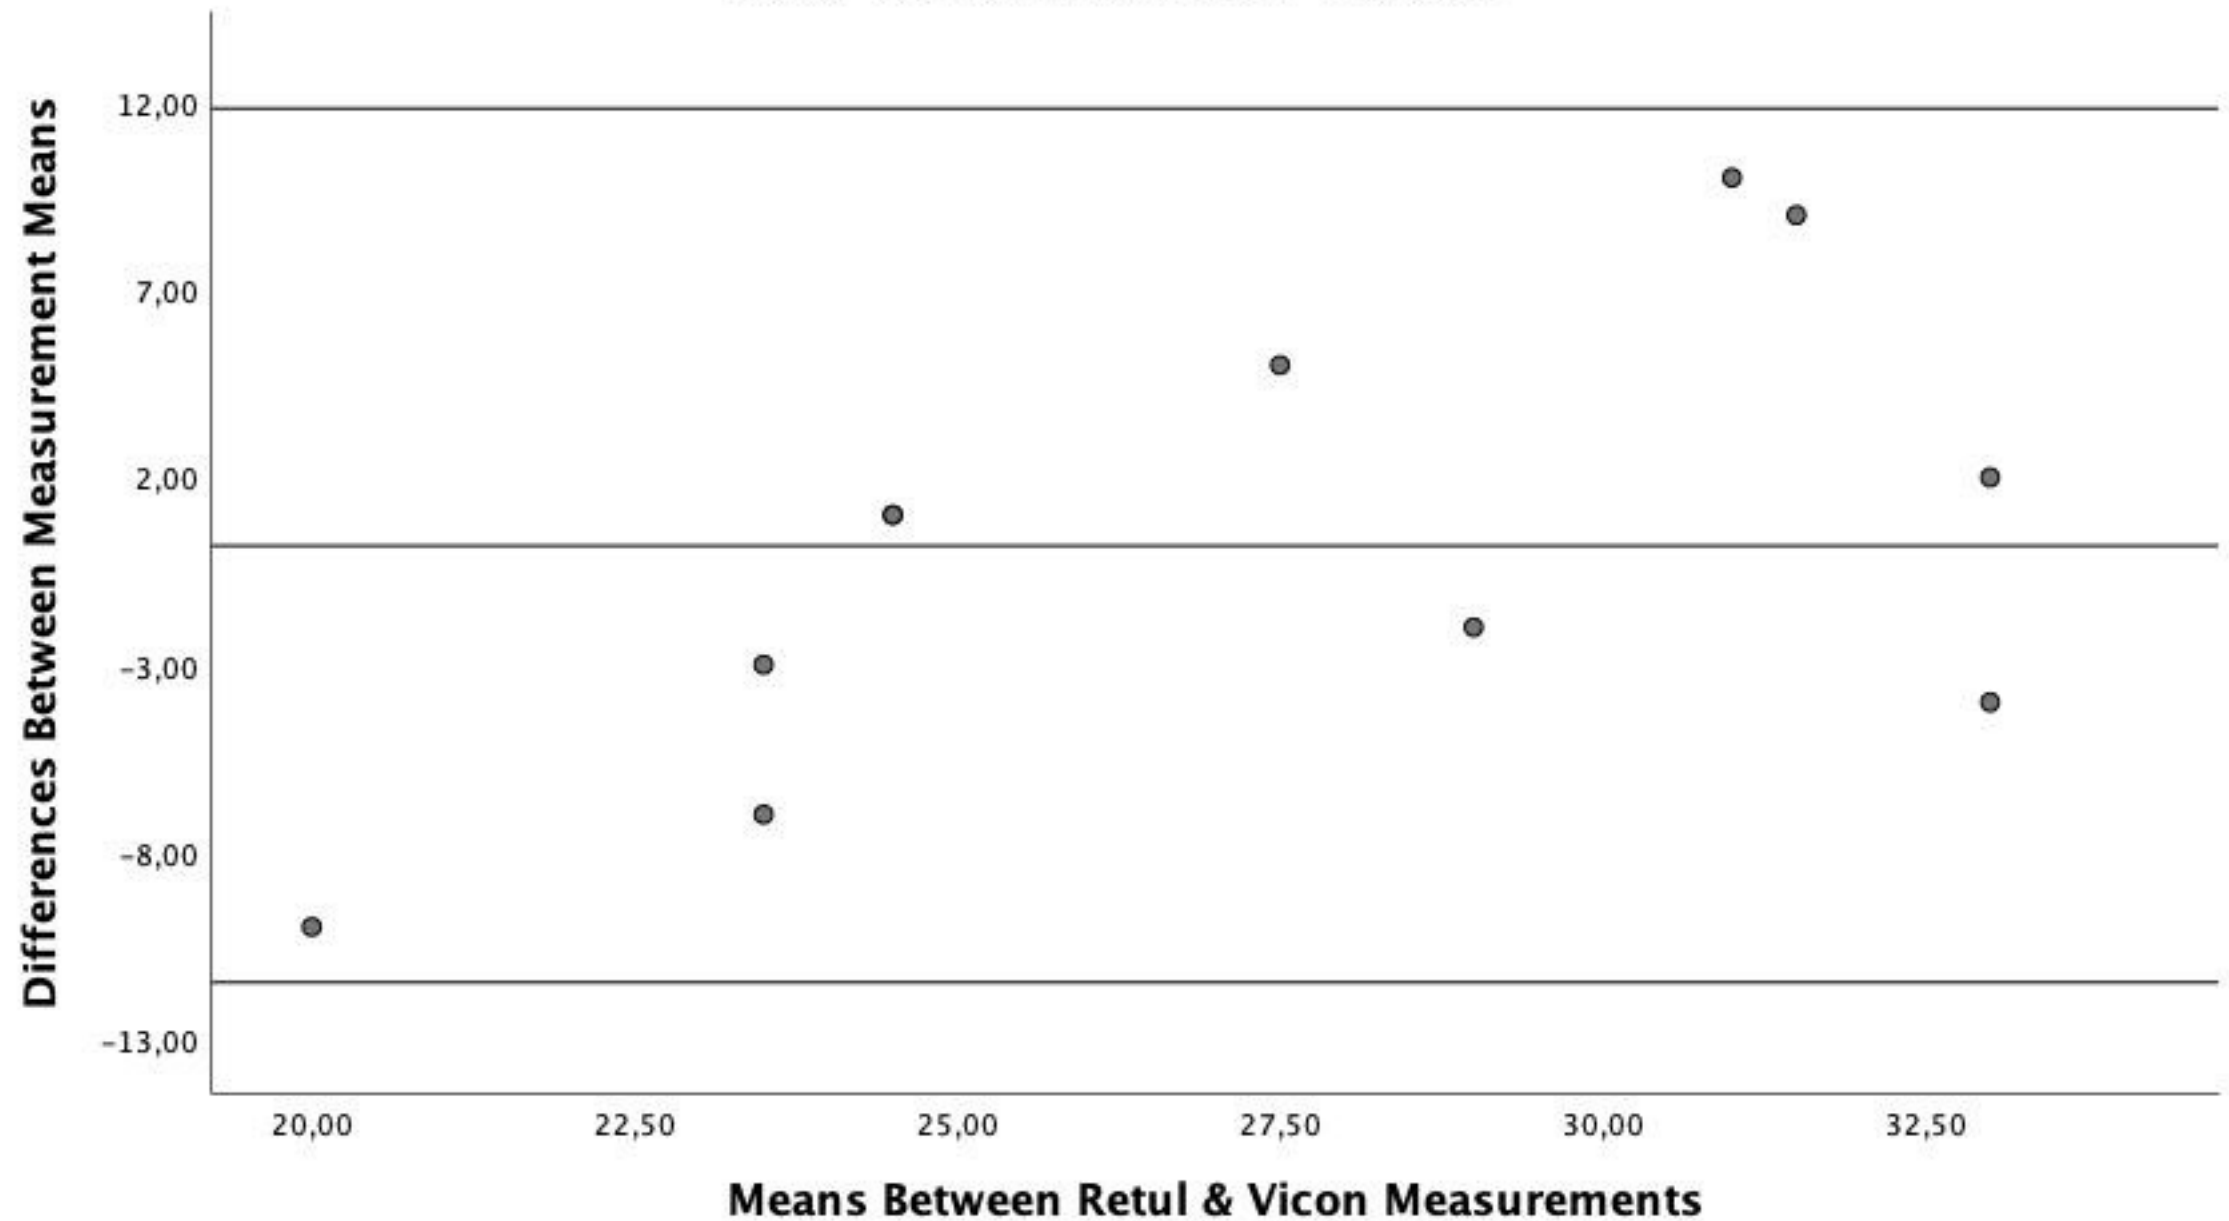

**Bland-Altman Plot 18: HLT Variable**

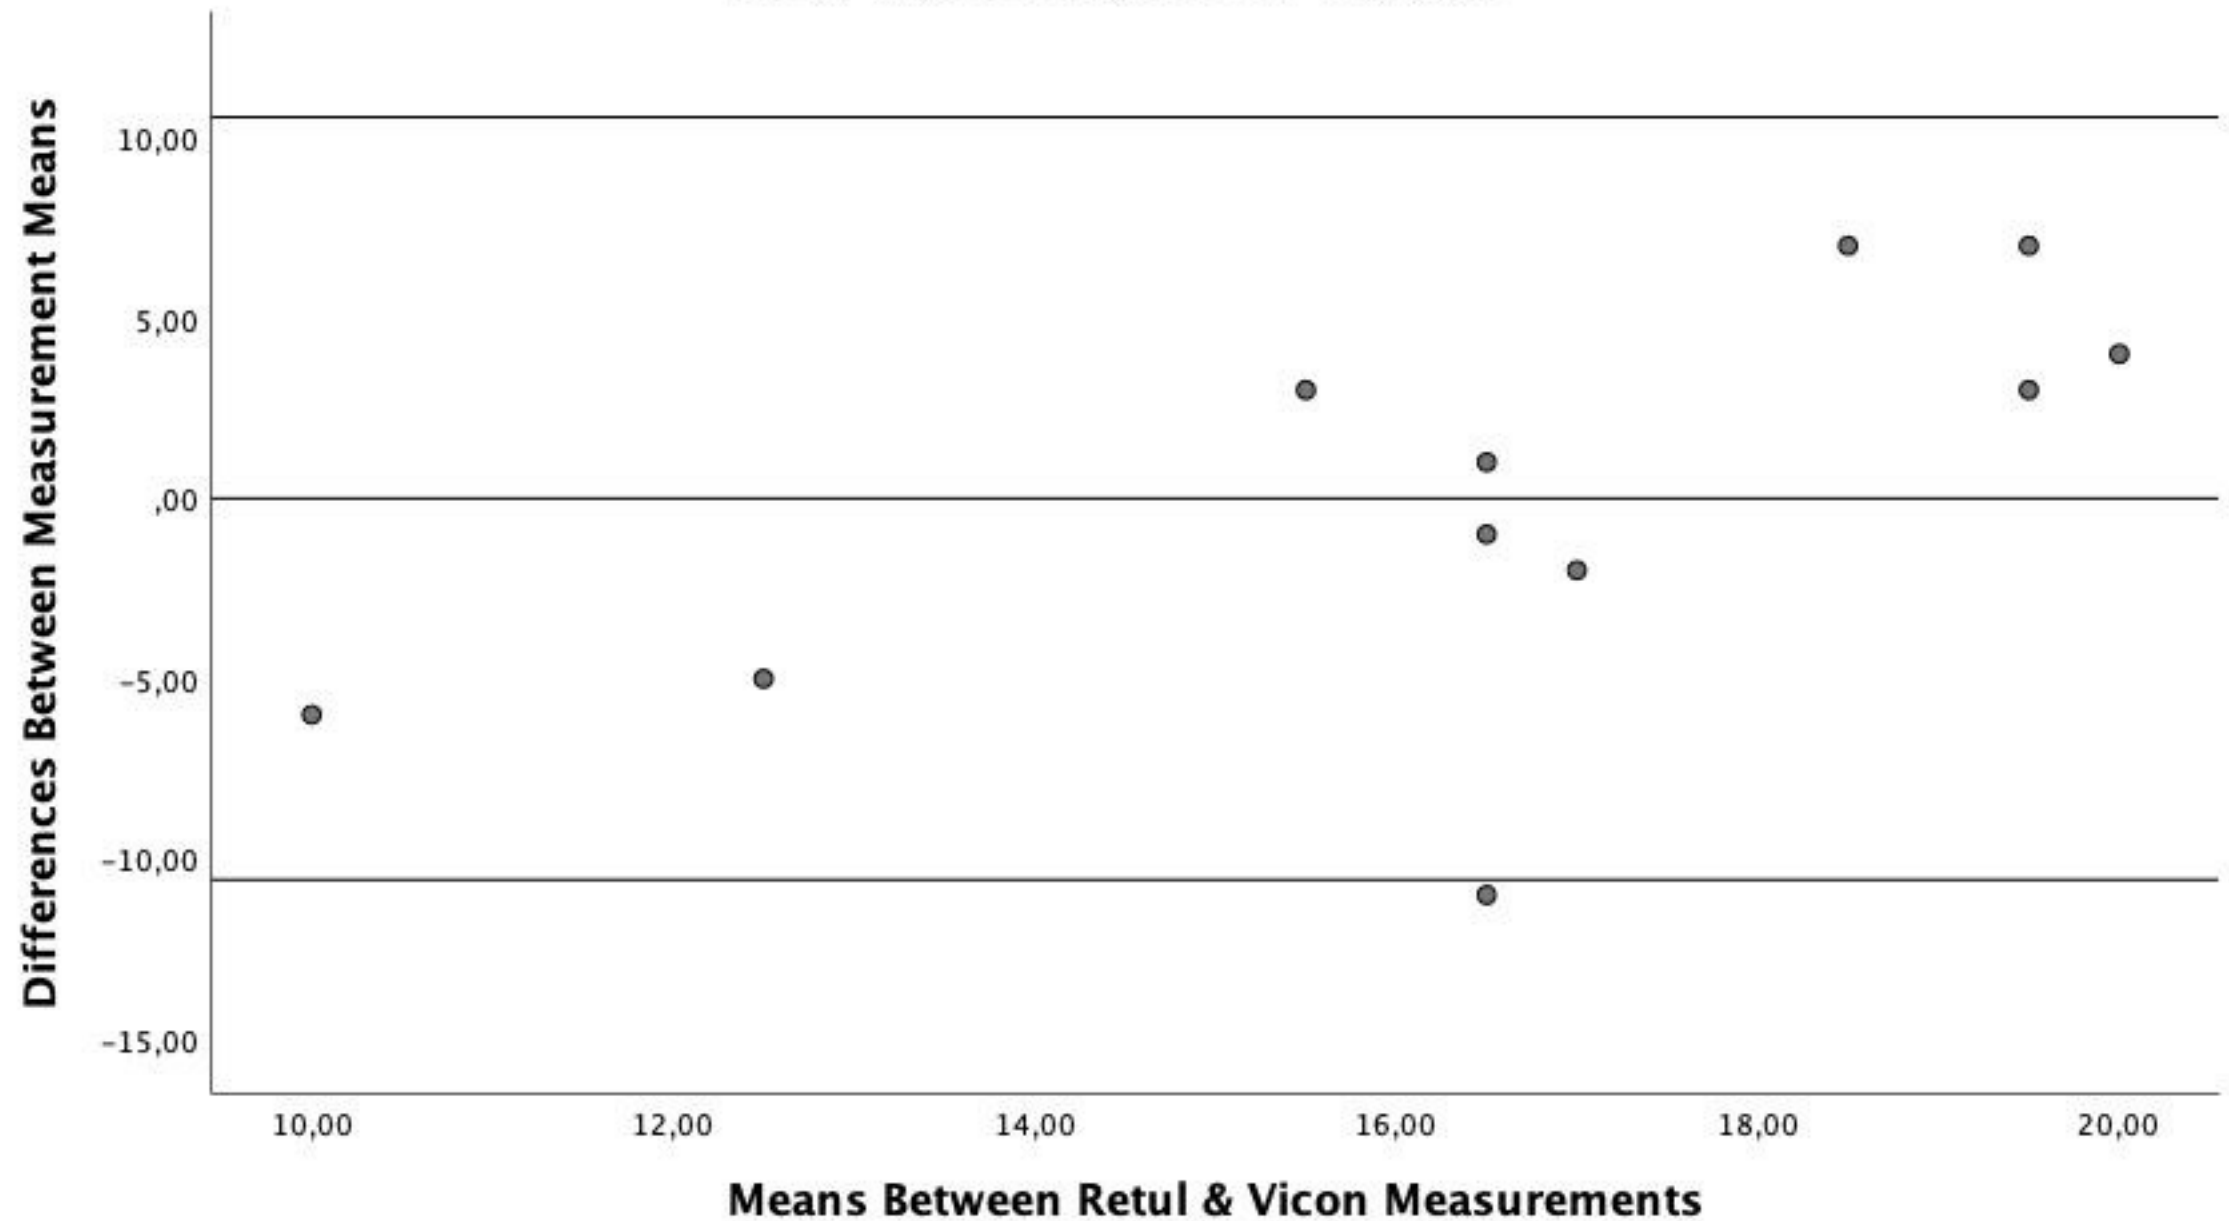

Supplement: s1 [file s1]
