# Supplementary material for: Validation of a 3D Camera System for Cycling Analysis
Source: MDPI journal article supplement (doi:10.3390/s21134473), 2021-06-30
Supplement: s1 [file s1]

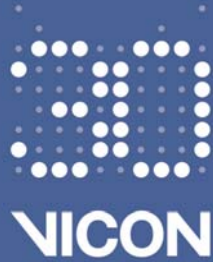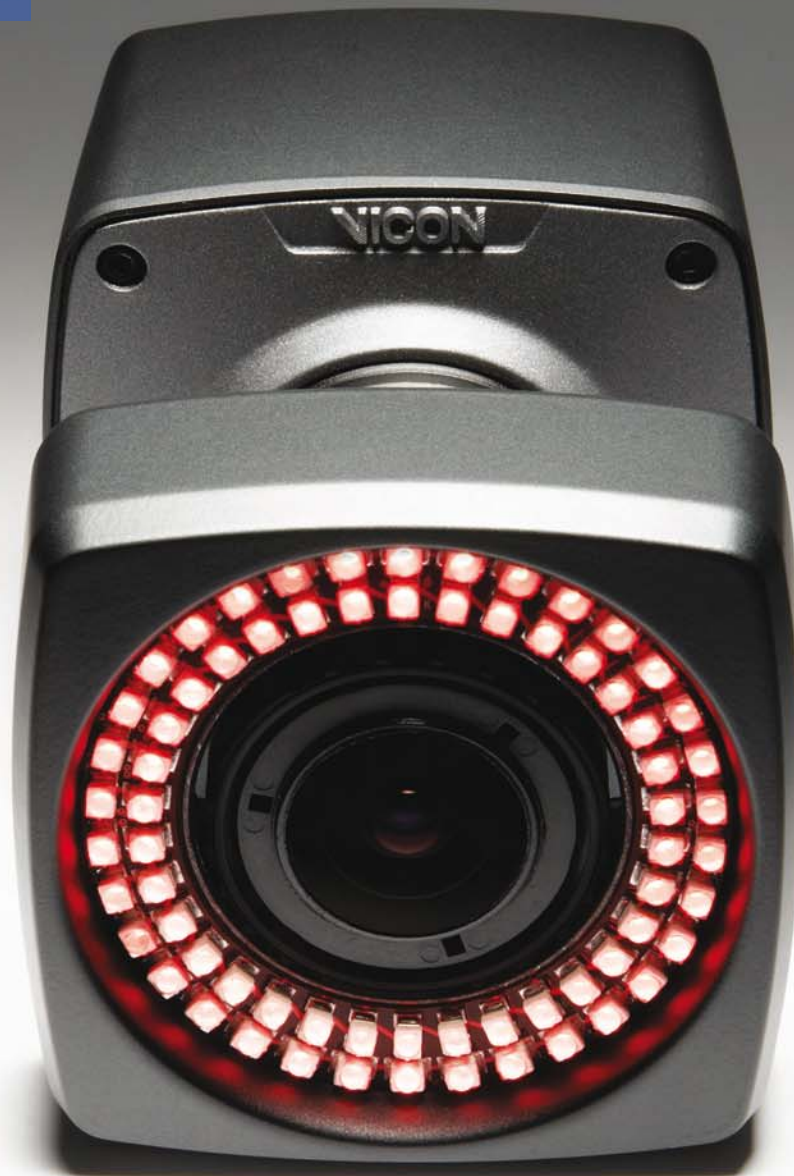

# Bonita

Size.Performance.Reliability.

Pioneering motion capture since 1984.

# Bonita

## Size. Performance. Reliability.

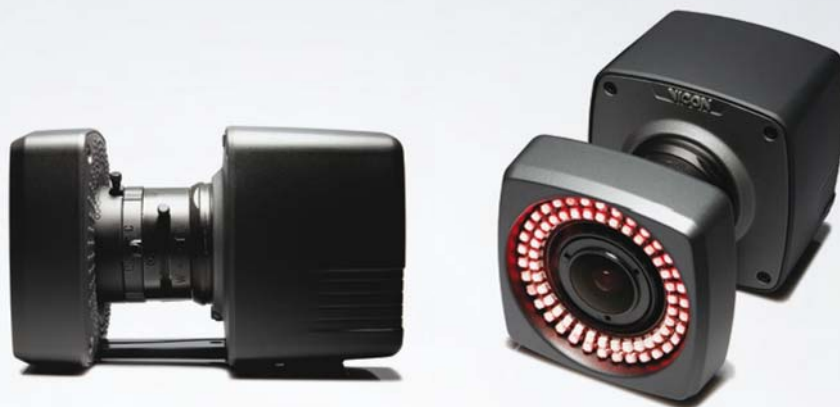

### Specifications

#### All Bonita Range

|                |                                  |
|----------------|----------------------------------|
| Interface      | Gigabit Ethernet, RJ45           |
| System latency | 2ms                              |
| Strobe         | 68 high powered NIR LEDs @ 780nm |
| Power          | 802.3af PoE                      |

#### Bonita 3

|                             |                           |
|-----------------------------|---------------------------|
| Frame Rate                  | 240 fps                   |
| Resolution                  | 0.3 megapixel (640 x 480) |
| Lens Operating Range        | Up to 12m                 |
| Angle of View Wide (4mm)    | 82.7° x 66.85°            |
| Angle of View Narrow (12mm) | 32.7° x 24.81°            |

#### Bonita 10

|                             |                           |
|-----------------------------|---------------------------|
| Frame Rate                  | 250 fps                   |
| Resolution                  | 1 megapixel (1024 x 1024) |
| Lens Operating Range        | Up to 13m                 |
| Angle of View Wide (4mm)    | 70.29° x 70.29°           |
| Angle of View Narrow (12mm) | 26.41° x 26.41°           |

Welcome to Bonita. Vicon's small optical camera family reliably streams the precise motion of markers, whether they are attached to people, animals or machines. Building on over 30 years of innovation, Bonita's speed, flexibility and affordability redefine the possibilities of motion capture.

#### Solution

Ergonomics. Training. Injury prevention. Synthetic environments. Static facial capture. Immersive reality. Virtual prototyping. Simulation. Visualization. Animation. Gait analysis. Sports biomechanics. Animal studies. Rehabilitation. Virtual camera tracking.

#### Precise

With its high resolution, quality optics and sophisticated algorithms, Bonita's new 1 megapixel camera, the Bonita 10, captures with precision, down to 0.5mm in a 4m x 4m volume.

#### Affordable

You don't have to choose between performance and price with the new

Bonita family. With complete systems starting at \$10,000 / £7,500, Bonita could change your idea of motion capture.

#### Fast

Capture speeds of up to 250 fps with the Bonita 10 and 240 fps with the Bonita 3, means you can easily and accurately capture the movements of fast moving objects.

#### Flexible

The beauty of the compact Bonita camera is you can mount them anywhere. With its Variable focal length lens and single cable ethernet connection, it's easy to optimize your set up. From the footwell of a car, to a complex virtual reality cave environment, you won't lose performance with Bonita.

#### Plug and play

Some motion capture systems have a reputation for being hard to set up. Not with Bonita. Just like its big brother T-series, Bonita uses a single cable to provide everything it needs – power, data and synchronisation. Calibrate and start streaming data in less than 2 minutes.

### Discover More

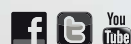

facebook.com/vicon  
twitter.com/\_vicon  
youtube.com/vicon100

[vicon.com/system/bonita](http://vicon.com/system/bonita)

Denver  
T: +1 303.799.8686  
Los Angeles  
T: +1 310.306.6131

[info@vicon.com](mailto:info@vicon.com)

Oxford  
T: +44 (0) 1865 261800  
Singapore  
T: +65 6400 3500
