# Supplementary material for: Validation of a 3D Camera System for Cycling Analysis
Source: Sensors (Basel). 2021 Jun 30;21(13):4473. doi: 10.3390/s21134473 (PMC8271997; doi:10.3390/s21134473)
Supplement: Supplementary file 1 [file sensors-21-04473-s001.zip]

Archive with 8 entries (8 files):
- Bland_Altman_Plots.pdf
- __MACOSX/._Bland_Altman_Plots.pdf
- Retul_Validation_v11.xlsx
- __MACOSX/._Retul_Validation_v11.xlsx
- Bonita_Camera_Specs.pdf
- __MACOSX/._Bonita_Camera_Specs.pdf
- Vantage_Camera_Specs.pdf
- __MACOSX/._Vantage_Camera_Specs.pdf
