# Supplementary material for: Validation of a 3D Camera System for Cycling Analysis
Source: Sensors (Basel). 2021 Jun 30;21(13):4473. doi: 10.3390/s21134473 (PMC8271997; doi:10.3390/s21134473)
Supplement: Supplementary file 1 [file sensors-21-04473-s001.zip › Retul_Validation_v11.xlsx]

## Sheet: Raw Data
	RETUL													VICON
Ankle Minimum	70	73	74	75	71	75	75	67	75	72	74			68	74	73	72	73	72	72	73	72	75	75
Ankle Maximum	97	99	96	90	94	99	94	91	94	90	99			90	97	92	99	97	94	93	94	96	94	95
Ankle Range	28	26	22	20	23	23	19	24	20	20	26			21	23	20	23	24	23	22	23	24	23	23
Ankle Angle at Bottom	97	97	95	92	93	99	94	90	93	90	99			88	96	91	96	96	94	93	93	96	96	96
Maximum Knee Flexion	110	110	110	111	113	112	110	112	111	112	111			113	109	110	112	112	112	111	110	112	112	112
Maximum Knee Extension	37	42	43	41	41	41	40	42	44	43	42			43	39	41	39	43	43	41	42	42	40	40
Knee Angle Range	74	70	60	70	70	73	70	70	68	67	75			69	70	70	69	70	68	72	69	70	71	68
Hip Angle Closed	46	45	42	51	50	53	50	55	48	47	47			49	42	49	50	48	51	46	46	45	50	56
Hip Angle Open	94	83	84	95	94	101	97	99	92	87	96			94	86	96	101	91	97	83	83	88	102	102
Hip Angle Range	45	44	44	44	44	45	47	43	44	40	45			45	44	47	47	44	45	43	42	43	45	44
Back Angle	22	20	18	27	26	25	23	28	23	21	27			23	22	24	25	22	23	22	22	22	26	27
Shoulder Angle to Wrist	115	132	119	109	108	99	115	106	105	116	110			115	115	110	105	113	117	119	119	107	108	109
Shoulder Angle to Elbow	75	83	83	75	75	70	75	72	68	78	76			72	76	74	72	79	79	79	79	74	72	71
Knee Forward of Foot	56	54	62	54	68	71	72	72	70	70	57			68	64	69	62	58	70	59	62	60	67	66
Knee Forward of Spindle	66	55	76	49	56	66	92	79	80	79	45			67	49	72	66	68	88	51	59	66	66	49
Knee Travel Tilt	5	2	5	4	3	3	4	3	4	2	5			5	1	3	2	3	4	3	5	3	5	5
Knee lateral Travel	31	25	15	20	25	28	30	22	34	36	36			35	24	25	27	24	30	25	25	32	26	27
Hip Lateral Travel	11	10	17	22	7	23	22	16	16	17	21			22	15	14	15	13	16	18	18	17	16	18
	A.Min					A.Max					A.Range					AA.Bottom					MKF
	Retul	Vicon	Diff	Mean		Retul	Vicon	Diff	Mean		Retul	Vicon	Diff	Mean		Retul	Vicon	Diff	Mean		Retul	Vicon	Diff	Mean
	70	68	2	69		97	90	7	93.5		28	21	7	24.5		97	88	9	92.5		110	113	-3	111.5
	73	74	-1	73.5		99	97	2	98		26	23	3	24.5		97	96	1	96.5		110	109	1	109.5
	74	73	1	73.5		96	92	4	94		22	20	2	21		95	91	4	93		110	110	0	110
	75	72	3	73.5		90	99	-9	94.5		20	23	-3	21.5		92	96	-4	94		111	112	-1	111.5
	71	73	-2	72		94	97	-3	95.5		23	24	-1	23.5		93	96	-3	94.5		113	112	1	112.5
	75	72	3	73.5		99	94	5	96.5		23	23	0	23		99	94	5	96.5		112	112	0	112
	75	72	3	73.5		94	93	1	93.5		19	22	-3	20.5		94	93	1	93.5		110	111	-1	110.5
	67	73	-6	70		91	94	-3	92.5		24	23	1	23.5		90	93	-3	91.5		112	110	2	111
	75	72	3	73.5		94	96	-2	95		20	24	-4	22		93	96	-3	94.5		111	112	-1	111.5
	72	75	-3	73.5		90	94	-4	92		20	23	-3	21.5		90	96	-6	93		112	112	0	112
	74	75	-1	74.5		99	95	4	97		26	23	3	24.5		99	96	3	97.5		111	112	-1	111.5
	Mean		0.181818			Mean		0.181818			Mean		0.181818			Mean		0.363636			Mean		-0.272727
	SD		2.88627			SD		4.56903			SD		3.24228			SD		4.37499			SD		1.28565
	Sup		5.83892			Sup		9.13712			Sup		6.53669			Sup		8.93861			Sup		2.24714
	Inf		-5.47528			Inf		-8.77348			Inf		-6.17306			Inf		-8.21133			Inf		-2.7926
	MKE					KAR					HAC					HAO					HAR
	Retul	Vicon	Diff	Mean		Retul	Vicon	Diff	Mean		Retul	Vicon	Diff	Mean		Retul	Vicon	Diff	Mean		Retul	Vicon	Diff	Mean
	37	43	-6	40		74	69	5	71.5		46	49	-3	47.5		94	94	0	94		45	45	0	45
	42	39	3	40.5		70	70	0	70		45	42	3	43.5		83	86	-3	84.5		44	44	0	44
	43	41	2	42		60	70	-10	65		42	49	-7	45.5		84	96	-12	90		44	47	-3	45.5
	41	39	2	40		70	69	1	69.5		51	50	1	50.5		95	101	-6	98		44	47	-3	45.5
	41	43	-2	42		70	70	0	70		50	48	2	49		94	91	3	92.5		44	44	0	44
	41	43	-2	42		73	68	5	70.5		53	51	2	52		101	97	4	99		45	45	0	45
	40	41	-1	40.5		70	72	-2	71		50	46	4	48		97	83	14	90		47	43	4	45
	42	42	0	42		70	69	1	69.5		55	46	9	50.5		99	83	16	91		43	42	1	42.5
	44	42	2	43		68	70	-2	69		48	45	3	46.5		92	88	4	90		44	43	1	43.5
	43	40	3	41.5		67	71	-4	69		47	50	-3	48.5		87	102	-15	94.5		40	45	-5	42.5
	42	40	2	41		75	68	7	71.5		47	56	-9	51.5		96	102	-6	99		45	44	1	44.5
	Mean		0.272727			Mean		0.0909091			Mean		0.181818			Mean		-0.0909091			Mean		-0.363636
	SD		2.66598			SD		4.52176			SD		4.96933			SD		9.25846			SD		2.34609
	Sup		5.49804			Sup		8.95355			Sup		9.9217			Sup		18.0557			Sup		4.2347
	Inf		-4.95259			Inf		-8.77173			Inf		-9.55806			Inf		-18.2375			Inf		-4.96197
	BA					SAW					SAE					KFF					KFS
	Retul	Vicon	Diff	Mean		Retul	Vicon	Diff	Mean		Retul	Vicon	Diff	Mean		Retul	Vicon	Diff	Mean		Retul	Vicon	Diff	Mean
	22	23	-1	22.5		115	115	0	115		75	72	3	73.5		56	68	-12	62		66	67	-1	66.5
	20	22	-2	21		132	115	17	123.5		83	76	7	79.5		54	64	-10	59		55	49	6	52
	18	24	-6	21		119	110	9	114.5		83	74	9	78.5		62	69	-7	65.5		76	72	4	74
	27	25	2	26		109	105	4	107		75	72	3	73.5		54	62	-8	58		49	66	-17	57.5
	26	22	4	24		108	113	-5	110.5		75	79	-4	77		68	58	10	63		56	68	-12	62
	25	23	2	24		99	117	-18	108		70	79	-9	74.5		71	70	1	70.5		66	88	-22	77
	23	22	1	22.5		115	119	-4	117		75	79	-4	77		72	59	13	65.5		92	51	41	71.5
	28	22	6	25		106	119	-13	112.5		72	79	-7	75.5		72	62	10	67		79	59	20	69
	23	22	1	22.5		105	107	-2	106		68	74	-6	71		70	60	10	65		80	66	14	73
	21	26	-5	23.5		116	108	8	112		78	72	6	75		70	67	3	68.5		79	66	13	72.5
	27	27	0	27		110	109	1	109.5		76	71	5	73.5		57	66	-9	61.5		45	49	-4	47
	Mean		0.181818			Mean		-0.272727			Mean		0.272727			Mean		0.0909091			Mean		3.81818
	SD		3.40636			SD		9.47812			SD		6.07665			SD		9.12992			SD		17.2459
	Sup		6.85829			Sup		18.3044			Sup		12.183			Sup		17.9855			Sup		37.6202
	Inf		-6.49465			Inf		-18.8498			Inf		-11.6375			Inf		-17.8037			Inf		-29.9838
	KTT					KLT					HLT
	Retul	Vicon	Diff	Mean		Retul	Vicon	Diff	Mean		Retul	Vicon	Diff	Mean
	5	5	0	5		31	35	-4	33		11	22	-11	16.5
	2	1	1	1.5		25	24	1	24.5		10	15	-5	12.5
	5	3	2	4		15	25	-10	20		17	14	3	15.5
	4	2	2	3		20	27	-7	23.5		22	15	7	18.5
	3	3	0	3		25	24	1	24.5		7	13	-6	10
	3	4	-1	3.5		28	30	-2	29		23	16	7	19.5
	4	3	1	3.5		30	25	5	27.5		22	18	4	20
	3	5	-2	4		22	25	-3	23.5		16	18	-2	17
	4	3	1	3.5		34	32	2	33		16	17	-1	16.5
	2	5	-3	3.5		36	26	10	31		17	16	1	16.5
	5	5	0	5		36	27	9	31.5		21	18	3	19.5
	Mean		0.0909091			Mean		0.181818			Mean		0
	SD		1.50481			SD		5.9516			SD		5.3936
	Sup		3.04034			Sup		11.8469			Sup		10.5715
	Inf		-2.85852			Inf		-11.4833			Inf		-10.5715

## Sheet: Demographic
	Table 01. Demographic and anthropometric characteristics of the sample (values with means ± standard deviations)
	Age (years)	38.71	± 8,00
	Height (m)	1.74	± 7,83
	Wingspan (m)	1.75	± 8,05
	Body Mass (kg)	77.62	± 10,82
	BMI (kg/cm2)	25.6375	± 1,78
	Rider Familiarity with Current Bicycle
	7 to 24 Months	n = 7 (64%)
	More than 24 Months	n = 4 (36%)
	Rider Training Volume
	200 to 400km/month	n = 9 (80%)
	400 to 800km/month	n = 2 (20%)

## Sheet: Inferential
	Measurements		Retul		Vicon		Mean Differences					Correlations		SEM			BA
			M	SD	M	SD	MD	SD	CI95%		p	ICC (CI95%)	r	Value	ICC (CI95%)		t	Reg
	A.Min	Ankle Minimum	72.818	2.6007	72.636	3.1072	0.1818	1.834	-1.0503	1.4139	0.749	0,894 (0,601 to 0,972)	0.808	0.822414	74.4299	71.2061	0.846	0.36
	A.Max	Ankle Maximum	94.818	3.4876	94.636	3.6407	0.1818	1.834	-1.0503	1.4139	0.749	0,935 (0,755 to 0,982)	0.868	1.10288	96.9796	92.6564	0.9	0.34
	AR	Ankle Range	22.818	2.9603	22.636	3.2946	0.1818	1.834	-1.0503	1.4139	0.749	0,913 (0,674 to 0,977)	0.833	0.936129	24.6528	20.9832	0.86	0.01
	AAB	Ankle Angle at Bottom	94.455	3.2362	94.091	3.3602	0.3636	2.0136	-0.9891	1.7164	0.563	0,903 (0,643 to 0,974)	0.814	1.02338	96.4608	92.4492	0.79	0.56
	MKF	Maximum Knee Flexion	111.05	1.15	111.364	1.5015	0.14	0.8944	-0.6009	1.49	0.932	0,911 (0,660 to 0,976)	0.823	0.363662	111.763	110.337	0.51	0.66
	MKE	Maximum Knee Extension	41.455	1.8635	41.182	1.94	0.2727	1.2721	-0.5819	1.1273	0.493	0,879 (0,561 to 0,967)	0.777	0.58929	42.61	40.3	0.75	0.55
	KAR	Knee Angle Range	69.727	4.0272	69.636	3.9566	0.0909	2.1659	-1.3641	1.5459	0.892	0,927 (0,724 to 0,980)	0.853	1.27351	72.2231	67.2309	0.95	0.01
	HAC	Hip Angle Closed	48.545	3.7246	48.364	4.1779	0.1818	2.562	-1.5393	1.903	0.819	0,892 (0,589 to 0,971)	0.796	1.17782	50.8535	46.2365	0.91	0.96
	HAO	Hip Angle Open	92.909	5.9069	93	6.5115	-0.0909	2.7002	-1.9049	1.7231	0.913	0,955 (0,830 to 0,988)	0.91	1.86793	96.5701	89.2479	0.97	0.54
	HAR	Hip Angle Range	44.091	1.7003	43.455	3.0451	0.6364	2.0627	-0.7493	2.0221	0.33	0,787 (0,251 to 0,942)	0.764	0.537682	45.1449	43.0371	0.63	0.81
	BA	Back Angle	23.636	3.2333	23.455	3.9841	0.1818	2.0889	-1.2215	1.5852	0.779	0,917 (0,686 to 0,978)	0.853	1.02246	25.64	21.632	0.86	0.09
	SAW	Shoulder Angle to Wrist	112.182	8.7501	112.455	8.311	-0.2727	3.7971	-2.8237	2.2782	0.817	0,952 (0,821 to 0,987)	0.902	2.76702	117.605	106.759	0.92	0.1
	SAE	Shoulder Angle to Elbow	75.455	4.6768	75.182	5.7065	0.2727	2.3277	-1.291	1.8365	0.706	0,951 (0,820 to 0,987)	0.918	1.47893	78.3537	72.5563	0.89	0.3
	KFF	Knee Forward of Foot	64.182	5.4714	64	16.9115	0.1818	5.6003	-3.5805	3.9442	0.916	0,972 (0,895 to 0,992)	0.944	1.73021	67.5732	60.7908	0.97	0.08
	KFS	Knee Forward of Spindle	67.545	4.949	66.727	18.0061	0.8182	5.8621	-3.12	4.7564	0.653	0,970 (0,989 to 0,992)	0.954	1.56501	70.6124	64.4776	0.5	0.44
	KTT	Knee Travel Tilt	3.636	1.1201	3.545	1.9164	0.0909	1.3003	-0.7827	0.9645	0.821	0,807 (0,250 to 0,949)	0.754	0.354207	4.33025	2.94175	0.85	0.55
	KLT	Knee lateral Travel	27.455	6.7877	27.273	5.7808	0.1818	4.2619	-2.6814	3.045	0.89	0,881 (0,545 to 0,968)	0.781	2.14646	31.6621	23.2479	0.92	0.05
	HLT	Hip Lateral Travel	16.545	5.3547	16.545	5.8028	0	2.4083	-1.6179	1.6179	1	0,955 (0,832 to 0,988)	0.91	1.6933	19.8639	13.2261	1	0.03
